# Supplementary material for: Biogeography and community structure of abyssal scavenging Amphipoda (Crustacea) in the Pacific Ocean
Source: Copernicus journal article supplement (doi:10.5194/bg-2018-347), 2018-08-07
Supplement: Supplementary file [file bg-2018-347-AC4-supplement.pdf]

1 **Biogeography and community structure of**  
2 **abyssal scavenging Amphipoda (Crustacea) in**  
3 **the Pacific Ocean.**

4  
5 Patel, Tasnim.<sup>1,2</sup>, Robert, Henri.<sup>1</sup>, D'Udekem D'Acoz, Cedric.<sup>3</sup>, Martens,  
6 Koen.<sup>1,2</sup>, De Mesel, Ilse.<sup>1</sup>, Degraer, Steven.<sup>1,2</sup> & Schön, Isa.<sup>1,4</sup>

7  
8 <sup>1</sup> *Royal Belgian Institute of Natural Sciences, Operational Directorate Natural Environment,*  
9 *Aquatic and Terrestrial Ecology, Vautierstraat 29, B-1000 Brussels, Gulledele 100, 1000*  
10 *Brussels and 3e en 23e linieregimentsplein, 8400 Oostende, Belgium.*

11 <sup>2</sup> *University of Ghent, Dept Biology, K.L. Ledeganckstraat 35, B-9000 Ghent, Belgium*

12 <sup>3</sup> *Royal Belgian Institute of Natural Sciences, Operational Directorate Taxonomy &*  
13 *Phylogeny, Vautierstraat 29, B-1000 Brussels, Belgium.*

14 <sup>4</sup> *University of Hasselt, Research Group Zoology, Agoralaan Building D, B-3590*  
15 *Diepenbeek, Belgium.*

16  
17 Corresponding author: [tpatel@naturalsciences.be](mailto:tpatel@naturalsciences.be)

28 **Abstract**

29

30 In 2015, we have collected more than 60,000 scavenging amphipod specimens during two  
31 expeditions to the Clarion-Clipperton fracture Zone (CCZ), in the Northeast (NE) Pacific and  
32 to the DISturbance and re-COLONisation (DisCOL) Experimental Area (DEA), a simulated  
33 mining impact disturbance proxy in the Peru basin, Southeast (SE) Pacific. Here, we compare  
34 biodiversity patterns of the larger specimens ( $> 15$  mm) within and between these two  
35 oceanic basins. Nine scavenging amphipod species are shared between these two areas, thus  
36 indicating connectivity. We further provide evidence that disturbance proxies seem to  
37 negatively affect scavenging amphipod biodiversity, as illustrated by a reduced alpha  
38 biodiversity in the DEA (Simpson Index ( $D$ ) = 0.62), when compared to the CCZ ( $D$  = 0.73)  
39 and particularly of the disturbance site in the DEA and the site geographically closest to it.  
40 Community compositions of the two basins differs, as evidenced by a Non-Metric  
41 Dimensional Scaling (NMDS) analysis of beta biodiversity. The NMDS also shows a further  
42 separation of the disturbance site (D1) from its neighbouring, undisturbed reference areas  
43 (D2, D3, D4 and D5) in the DEA. A single species, *Abyssorchomene gerulicorbis*, dominates  
44 the DEA with 60% of all individuals.

45 **Keywords**

46

47 JPIO Ecological Aspects of Deep-sea mining, Clarion Clipperton Fracture Zone, CCZ, DisCOL  
48 Experimental Area (DEA), Amphipoda.

49

50

51

52

53

54

55

56

57

58

## 59 **Introduction**

60

61 **The abyssal deep sea** (3000 - 6000 m) represents the largest ecosystem on the planet, with the  
62 abyssal seafloor covering approximately 54% of the Earth's solid surface (Rex et al. 1993;  
63 Gage & Tyler, 1991). Since it is one of the least investigated ecosystems, there are still  
64 extensive gaps in our knowledge of deep-sea fauna (German et al. 2011). Marine research has  
65 thus far focused on coastal areas, hydrothermal vents or chemosynthetic habitats, whereas  
66 open-ocean abyssal plains have been less extensively investigated (Ramirez-Llodra et al.  
67 2010). This is unsurprising given the challenges of sampling this remote environment, which  
68 is impeded by several confounding factors. For example, deep-sea sampling is both  
69 financially expensive and labour intensive, and furthermore, constrained by the challenge of  
70 deploying equipment at low temperatures (0.01 - 4.0°C) and at high hydrostatic pressures  
71 (Sweetman et al. 2017). Therefore, to date very little of the deep sea has been sampled, and  
72 the oversampling in the North Atlantic basin has created a biased knowledge base (McClain  
73 & Hardy, 2010). Consequently, and owing to the low availability of data on deep-sea  
74 biodiversity, and with the inherent risk of under-sampling, it is difficult to estimate species  
75 richness in the deep sea.

76

77 In the traditional view of the deep sea, the abyss was considered to be homogeneous and  
78 many species were thought to have large biogeographical ranges, their dispersal aided by an  
79 apparent lack of barriers (Sanders, 1968). This hypothesis was challenged by the discovery of  
80 chemosynthetic habitats e.g. hydrothermal vents (Lonsdale, 1977), cold seeps (Paull et al.  
81 1984), seasonal fluctuations in primary productivity (Billett et al. 1983) and erratic whale-  
82 falls (Smith et al. 1989). All of this research has demonstrated that the deep sea is an  
83 extremely heterogeneous environment and is controlled by many factors, including:  
84 Particulate Organic Carbon (POC) flux, water depth, flow regime, current circulation,  
85 seafloor topography (Laver et al. 1985) and also historical factors e.g. the opening of ocean  
86 basins (i.e. rifting), sea-level rise and fall, and periods of deep-sea anoxia (Smith et al. 2006).  
87 All of these can result in a mosaic of different communities (Levin et al. 2001), many of  
88 which do not follow a latitudinal gradient (Brandt et al. 2007).

89

90 It has also been established that dispersal ability of species on the one hand, and their actual  
91 geographic and bathymetric distribution range on the other, are not always linked, and are  
92 often dependent on habitat suitability, fragmentation, and ecological flexibility (Lester et al.  
93 2007; Liow 2007). Therefore, although the deep-seafloor includes some of the largest  
94 contiguous features on the planet, the populations of many deep-sea species are spatially  
95 fragmented, and may become increasingly so with continued human disturbance (Hilario et  
96 al. 2015).

97

98 In the last decade, there has been an increased demand for exploitation of deep-sea resources  
99 e.g. hydrocarbon/rare earth element (REE) extraction (such as those concentrated in  
100 manganese nodule provinces) (Ramirez-Llodra et al. 2011). As a result, ecologists are  
101 increasingly asked to assess the ecological risks of these mining activities and to provide  
102 sustainable solutions for its mitigation, in order to prevent adverse changes to the deep-sea  
103 ecosystem (ISA, 2017).

104

105 Glover et al. (2001) showed that abyssal sediments can contain high biodiversity with more  
106 than 100 species of meiofaunal invertebrates (e.g. nematodes, copepods) and protists (e.g.  
107 foraminifers) found every square meter. In spite of this, our knowledge on the deep-sea  
108 ecosystem structure and functioning is still limited, and there is a paucity of data on the  
109 distribution, drivers and origins of deep-sea communities at global scales. This is especially  
110 true for the biogeography of deep-sea Amphipoda (Barnard 1961; Thurston 1990) and other  
111 invertebrates.

112

113 Although recent morphological and molecular studies have shed new light on the distribution  
114 and habitat niches of certain benthic-pelagic amphipods (e.g. *Eurythenes*) (Havermans, 2016;  
115 Narahara-Nakano et al. 2017), there is little published so far on how widespread other  
116 amphipod species may be. This lack of information on species richness and ecological  
117 uniqueness hampers the answering of crucial questions on recoverability of anthropogenic  
118 impacts. Ultimately this impedes ecologists from providing advice on sustainable deep-sea  
119 mining practices, thus, underpinning the need for this dedicated deep-sea ecosystem research.

120

121 Here, we present distribution patterns of scavenging deep-sea amphipod communities, with  
122 the first comparisons of their biogeography and community structures in two oceanic basins.

123 These two basins are the research areas for simulating/studying the anthropogenic impacts of  
124 deep-sea nodule mining.

125

126 We are investigating whether there are differences and similarities in the species  
127 compositions of the two basins (e.g. richness, abundances), and further exploit a disturbance  
128 experiment to compare the biodiversity of this mining impact proxy to the undisturbed  
129 reference areas. We discuss the possible implications of our findings; aiming to use them to  
130 formulate recommendations regarding the pending deep-sea mining of manganese nodule  
131 activities in the NE Pacific ecosystem.

## 132 **Material and Methods**

133

### 134 *Study area*

135

136 We investigated the amphipod communities of two oceanic basins (Figure 1); (i) the Clarion-  
137 Clipperton Fracture Zone (CCZ, six million km<sup>2</sup>, 7000 km wide), an economically important  
138 manganese nodule field in the NE Pacific, comprising several different contractor claim  
139 areas, (who to date, have exploration licences only), and nine designated Areas of Particular  
140 Ecological Interest (APEIs) as designated by the International Seabed Authority (ISA)  
141 (Lodge et al, 2014) and (ii) the DISturbance and re-COLONisation (DisCOL) Experimental  
142 Area (DEA, 11 km<sup>2</sup>, 4 km wide), a mining disturbance proxy (also containing manganese  
143 nodules) in the Peru Basin in the SE Pacific. In 1989, the DEA sediment bed was artificially  
144 disturbed using a plough-harrow to create 78 track marks. These are supposed to simulate the  
145 type of disruption which would be caused by a commercial mining operation (Appendix 1)  
146 (Thiel, 1992). This baseline study was a new approach in deep-sea risk assessment and is still  
147 ongoing today, providing us with crucial data from this long-term ecological experiment.

148

149

150

151

152

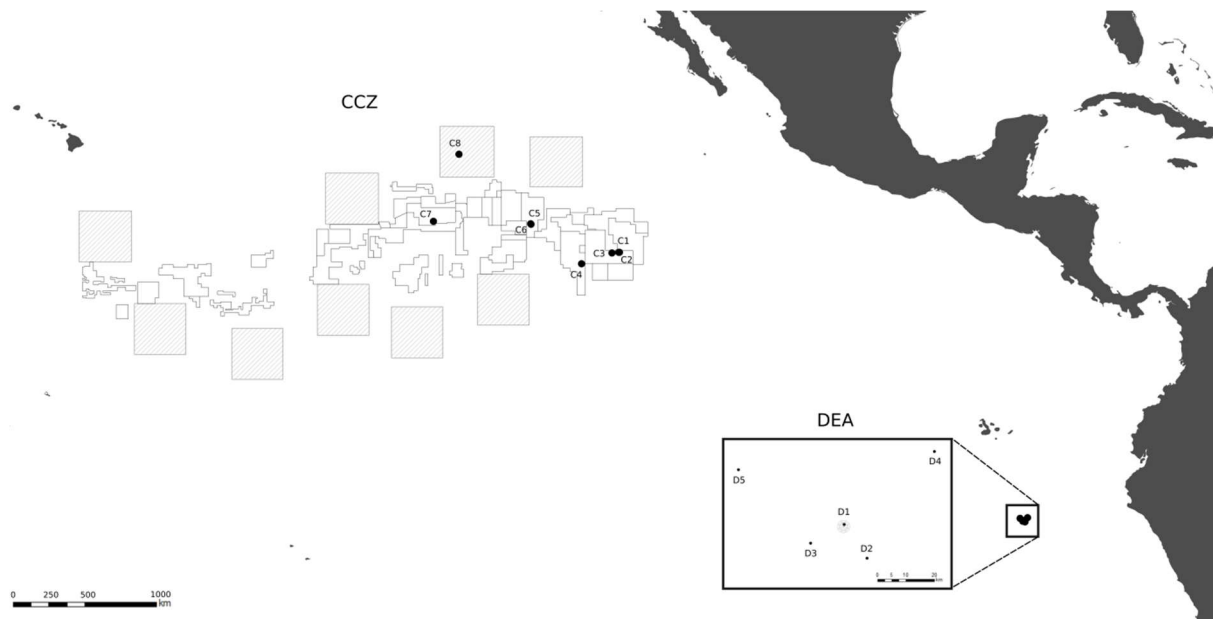

153

154 **Figure 1: Geographic locations of the two study areas, the Clarion-Clipperton fracture**  
 155 **Zone (CCZ) (Northeast Pacific) and the DISTurbance and re-COLonisation (DisCOL)**  
 156 **Experimental Area (DEA) (Peru Basin, Southeast Pacific).** There are nine Areas of  
 157 Particular Ecological Interest (APEIs) in the CCZ region, which are illustrated by 400 x 400  
 158 km<sup>2</sup> white boxes. Grey boxes indicate the various contractor claim areas in the CCZ. We  
 159 deployed eight amphipod traps across the CCZ, which is 16,000 km<sup>2</sup> and 7000 km wide, and  
 160 five in the DEA, which encompasses 11 km<sup>2</sup> with a width of 4 km.

161

### 162 *Sampling*

163

164 In 2015 (26 years after the first impact in the DEA in 1989), two research expeditions with  
 165 the “RV Sonne” visited the CCZ (cruise SO239) and revisited the DEA (cruise SO242-1 &  
 166 SO242-2), to assess if and how the deep-sea faunal communities had recovered within the  
 167 DEA, and to attempt to quantify their recolonization potential.

168

169 Amphipod samples were taken from the CCZ and DEA using a free-fall lander (120 x 120 x  
 170 120 cm), to which four plastic traps were attached (two 20 x 25 x 40 cm traps with four cm  
 171 openings and two 25 x 40 x 60 cm traps with eight cm openings), **baited for each station with**  
 172 **an 800 g mixture of mackerel, squid and shrimp.** Using this specially designed deep-sea  
 173 sampling equipment, more than 60,000 specimens of scavenging amphipods were collected  
 174 from the CCZ and the DEA sites.

175

176 The baited trap was deployed eight times across the CCZ at a depth range of 4116 - 4932 m  
 177 (samples C1 - C8), and five times in the DEA at a depth range of 4078 – 4307 m (samples D1

178 - D5; Figure 1, Table 1). In the CCZ, we sampled within three different contractor claim  
179 areas (Table 1) to obtain a pre-disturbance baseline, and to then compare it with one of the  
180 nine protected APEIs around the CCZ. In contrast, in the DEA, sampling was conducted once  
181 within the disturbed area (D1), twice 10 km away (D2, D3) and twice 40 km away (D4, D5)  
182 from D1 in four surrounding reference areas (see Figure 1).

183  
184  
185  
186  
187  
188  
189  
190  
191  
192  
193  
194  
195  
196  
197  
198  
199  
200  
201  
202  
203  
204  
205

206 **Table 1: Station overview.**

207 Codes refer to the codes used in this paper in figures 1, 3, 4, 6 and Table 3. The original  
 208 station code represents the cruise codes from (SO239 and SO232-1). Depth refers to water  
 209 depth (m) on deployment. Nodule presence/absence information is known only for stations  
 210 D3 and D4.

| Deployment Code | Original Station Code | Depth (m) | Known geological features                   | Remarks                                       | Residence Time (h:m:s) |
|-----------------|-----------------------|-----------|---------------------------------------------|-----------------------------------------------|------------------------|
| C1              | SO239-33              | 4122      | Plains                                      | German claim                                  | 100:20:00              |
| C2              | SO239-37              | 4116      | Plains                                      | German claim                                  | 125:49:00              |
| C3              | SO239-63              | 4354      | Plains                                      | German claim                                  | 66:07:00               |
| C4              | SO239-96              | 4388      | Seamount                                    | Inter Ocean Metals (IOM) claim                | 63:02:00               |
| C5              | SO239-123             | 4529      | Plains                                      | Belgian claim                                 | 26:12:00               |
| C6              | SO239-139             | 4516      | Plains<br>North/South<br>+ seamount to west | Belgian claim                                 | 56:33:00               |
| C7              | SO239-173             | 4934      | Plains                                      | French claim                                  | 79:40:00               |
| C8              | SO239-205             | 4855      | Plains                                      | Area of Particular Ecological Interest (APEI) | 55:59:00               |
| D1              | SO242/1-8             | 4146      | Plains                                      | Disturbed                                     | 44:26:33               |
| D2              | SO242/1-30            | 4307      | Plains                                      | Undisturbed Reference                         | 51:11:18               |
| D3              | SO242/1-55            | 4043      | Seamount<br>No nodules                      | Undisturbed Reference                         | 25:09:09               |
| D4              | SO242/1-68            | 4078      | Seamount<br>No nodules                      | Undisturbed Reference                         | 65:20:46               |
| D5              | SO242/1-106           | 4269      | Plains                                      | Undisturbed Reference                         | 47:00:50               |

211  
 212  
 213  
 214  
 215  
 216  
 217  
 218



219 ***Processing***

220

221 On recovery of the lander, all traps were disconnected and placed in pre-cooled (4°C) buckets  
222 of filtered seawater. All specimens were washed on board in a cool-climate laboratory (4°C),  
223 morphologically pre-sorted and fixed in molecular grade (95%) ethanol, before being stored  
224 at -20°C.

225

226 Detailed sorting and identification was performed using the morphological species concept  
227 (Futuyama, 1998) and the keys of Lowry & Killagen (2014) and Schulenberger & Barnard  
228 (1976), to separate the samples into taxonomic “morphotypes”. The larger fraction (> 15 mm  
229 length) has been identified to the lowest possible taxonomic resolution. Species not assigned  
230 with certainty are denoted here by as affiliated species (e.g. *genus* aff. *species*) or conferred  
231 species (e.g. *genus* cf. *species*).

232

233 Specimens with a size of less than 15 mm length were excluded from the analysis, primarily  
234 because these were mostly juveniles, and their morphological differences were not  
235 sufficiently pronounced to allow an accurate identification to the species or even genus level.  
236 Also, all pelagic amphipod specimens were omitted which were accidentally caught when the  
237 sampling equipment was retrieved to the sea surface. Genera containing multiple and as yet  
238 unidentified species have been summarised as “spp.”

239

240 ***Statistical analyses***

241

242 Our null hypothesis ( $H_0$ ) here is that there are no differences in the amphipod biodiversity of  
243 the two basins. To test this hypothesis, we firstly calculated the alpha biodiversity of the two  
244 basins was using the Simpson Index ( $D$ ) (Simpson, 1949) (Appendix 4). Individual-based  
245 rarefaction curves were generated using the rarefy function of the vegan package in R 2.3.0  
246 (R Core Team, 2013; Gotelli, 2001) to compare species richness across all thirteen sampling  
247 stations and to test for the completeness of sampling.

248

249 Secondly, to compare the beta biodiversity, we estimated the variability of the community  
250 compositions between sites. The Bray-Curtis dissimilarity metric (Bray & Curtis, 1957), was  
251 used to calculate differences between community compositions based on species densities,  
252 and the results were then visualised in 2D using a Non-Metric Dimensional Scaling (NMDS)

253 plot. The ANOSIM function in the vegan package of R (R Core Team, 2013; Taguchi & Ono,  
254 2005) was used to test the statistical significance of the differences in species compositions  
255 between the two study areas.

256

257

## 258 **Results**

259

### 260 ***Basin biodiversity***

261

262 In total, 6916 scavenging amphipods (> 15 mm) were collected from the thirteen trap  
263 deployments in the two study areas, representing nineteen morphotypes (Figure 2). In the  
264 CCZ, we collected 3932 individuals, which represent ten morphotypes. Five of these have  
265 been identified to the species level: *Abyssorhomene distinctus*, *A. gerulicorbis*, *Eurythenes*  
266 *sigmiferus*, *Paralicella caperesca* and *Valettietta tenuipes*. A further two are affiliated to a  
267 species: *Paracallisoma* aff. *alberti* and *Valettietta* cf. *gracilis*, and the remaining three are at  
268 least affiliated to a genus (Tables 2a and 2b). The 2984 individuals from the DEA represent  
269 eighteen morphotypes. Six of these have been identified to the species level: *Abyssorhomene*  
270 *distinctus*, *A. gerulicorbis*, *Eurythenes sigmiferus*, *Paralicella caperesca*, *Parandaniexis*  
271 *mirabilis* and *Tectovallopsiis regelatus*. A further five which have been affiliated to a species:  
272 *Eurythenes* sp. 2. aff. *gryllus*, *Eurythenes* sp. 4. aff. *magellanicus*, *Paracallisoma* aff. *alberti*,  
273 *Stephonyx* sp. nov. aff. *arabiensis* and *Valettietta* cf. *gracilis* and the remaining seven  
274 identified to at least an affiliated genus (Tables 2a and 2b).

275

276 There are nine morphotypes shared between the basins: *Abyssorhomene distinctus*, *A.*  
277 *gerulicorbis*, *Abyssorhomene* spp., *Eurythenes sigmiferus*, *Eurythenes* spp. nov.,  
278 *Paracallisoma* aff. *alberti*, *Paralicella caperesca*, *Parandania* sp. and *Valettietta* cf. *gracilis*  
279 (Figure 2).

280

281 Two morphotypes were found only in the CCZ (*Hirondellea* sp. & *Valettietta tenuipes*), and  
282 eight morphotypes were found only in the DEA (*Eurythenes* sp. 1-4, gen. aff. *Cleonardo*,  
283 *Parandaniexis mirabilis*, *Stephonyx* sp. nov. aff. *arabiensis*, and *Tectovallopsiis regelatus*)  
284 (Table 2).

285

286

287

288

289

290

291

### Amphipod Trap Biodiversity in the CCZ & DEA

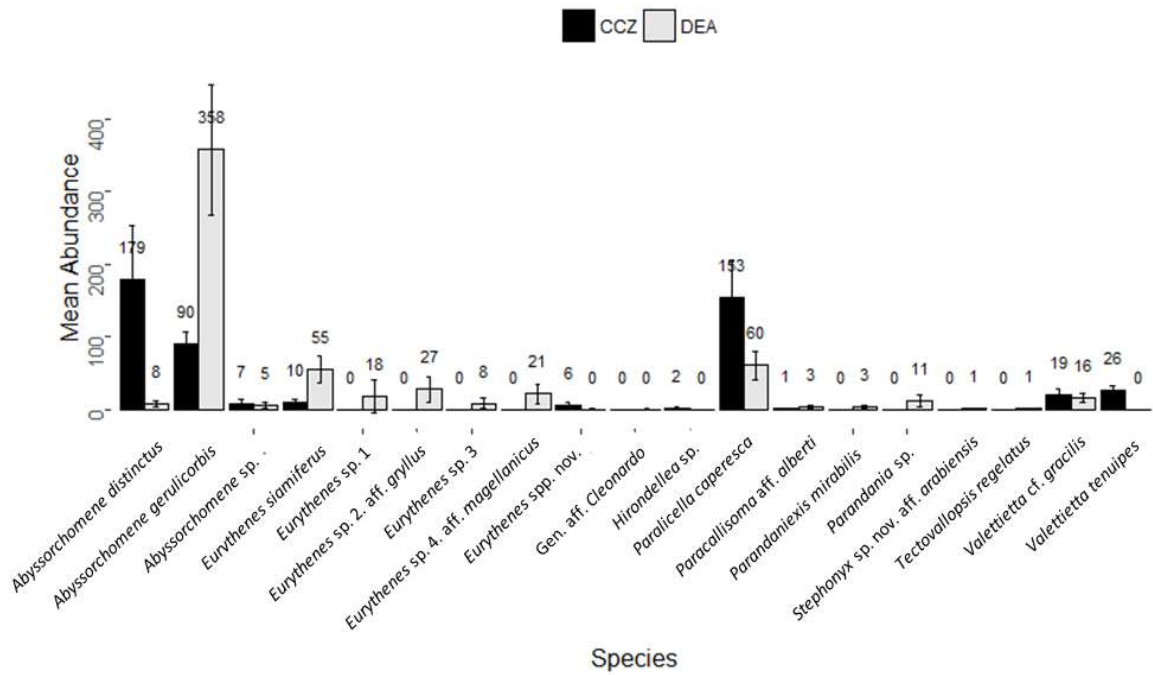

292

293

294 **Figure 2: Histogram showing the species assemblage for the scavenging community in**  
295 **the Clarion-Clipperton fracture Zone (CCZ) (black) and the DisCOL Experimental**  
296 **Area (DEA) (grey). The abundances of 19 morphotypes are shown.**

297

298

299

300

301

302

303

304

305

306

307

308

309

310

311 **Table 2a: Overview of morphotypes across the Clarion-Clipperton fracture Zone (CCZ)**  
 312 **and DisCOL Experimental Area (DEA).**

|                                       |                                               |                          |
|---------------------------------------|-----------------------------------------------|--------------------------|
|                                       | Clarion-Clipperton fracture Zone              | DisCOL Experimental Area |
| Total unique morphotypes collected    | 19 (10 found in the CCZ, 18 found in the DEA) |                          |
| Species possibly unique to this basin | 2                                             | 8                        |
| Shared species between basins         | 9                                             |                          |

313  
314

315 **Table 2b: Distribution and abundances of morphotypes across the Clarion-Clipperton**  
 316 **fracture Zone (CCZ) and DisCOL Experimental Area (DEA). Green = shared, Yellow =**  
 317 **DEA only, Blue = CCZ only.**

318

| Species                                          | C1  | C2  | C3  | C4  | C5  | C6 | C7  | C8  | D1  | D2  | D3  | D4  | D5  |
|--------------------------------------------------|-----|-----|-----|-----|-----|----|-----|-----|-----|-----|-----|-----|-----|
| <i>Abyssochomene distinctus</i>                  | 629 | 312 | 180 | 170 | 64  | 47 | 2   | 25  | 9   | 3   | 25  | 0   | 5   |
| <i>Abyssochomene gerulicorbis</i>                | 73  | 47  | 48  | 107 | 71  | 65 | 184 | 121 | 351 | 143 | 522 | 178 | 595 |
| <i>Abyssochomene spp.</i>                        | 0   | 0   | 50  | 0   | 0   | 3  | 0   | 0   | 5   | 20  | 0   | 0   | 0   |
| <i>Eurythenes sigmiferus</i>                     | 9   | 3   | 35  | 11  | 12  | 5  | 0   | 6   | 30  | 61  | 127 | 36  | 22  |
| <i>Eurythenes</i> sp. 1                          |     |     |     |     |     |    |     |     | 0   | 90  | 0   | 0   | 1   |
| <i>Eurythenes</i> sp. 2. aff. <i>gryllus</i>     |     |     |     |     |     |    |     |     | 119 | 0   | 9   | 0   | 9   |
| <i>Eurythenes</i> sp. 3                          |     |     |     |     |     |    |     |     | 0   | 0   | 3   | 39  | 0   |
| <i>Eurythenes</i> sp. 4 aff. <i>magellanicus</i> |     |     |     |     |     |    |     |     | 0   | 0   | 59  | 0   | 47  |
| <i>Eurythenes</i> .spp.nov.                      | 6   | 3   | 2   | 0   | 0   | 20 | 1   | 12  | 0   | 1   | 0   | 0   | 0   |
| gen. aff. <i>Cleonardo</i>                       |     |     |     |     |     |    |     |     | 1   | 0   | 0   | 0   | 0   |
| <i>Hirondellea</i> sp.                           | 0   | 2   | 0   | 0   | 0   | 0  | 5   | 10  |     |     |     |     |     |
| <i>Paracallisoma</i> aff. <i>alberti</i>         | 0   | 0   | 0   | 0   | 2   | 1  | 6   | 10  | 4   | 0   | 1   | 1   | 1   |
| <i>Parallicella caperesca</i>                    | 104 | 4   | 114 | 152 | 255 | 75 | 63  | 460 | 86  | 108 | 80  | 21  | 7   |
| <i>Parandania</i> sp.                            |     |     |     |     |     |    |     |     | 5   | 2   | 42  | 5   | 1   |
| <i>Parandaniexis mirabilis</i>                   |     |     |     |     |     |    |     |     | 11  | 0   | 3   | 0   | 0   |
| <i>Stephonyx</i> sp. nov. aff. <i>arabiensis</i> |     |     |     |     |     |    |     |     | 0   | 4   | 0   | 0   | 0   |
| <i>Tectovallopsis regelatus</i>                  |     |     |     |     |     |    |     |     | 5   | 0   | 0   | 0   | 0   |
| <i>Valettieta</i> cf. <i>gracilis</i>            | 75  | 11  | 29  | 3   | 2   | 5  | 1   | 23  | 2   | 29  | 17  | 1   | 29  |
| <i>Valettieta tenuipes</i>                       | 22  | 0   | 14  | 42  | 43  | 9  | 19  | 58  |     |     |     |     |     |

319  
320  
321  
322  
323  
324  
325

326  
327  
328  
329  
330  
331  
332  
333  
334  
335  
336  
337

### Sampling completeness

Due to differences in allocated ship-times (CCZ cruise being 52 days and the DEA cruise being 29 days), the trap deployments were not identical, making it necessary to normalise deployment times. The resulting Catch Per Unit Effort (CPUE) plot (Figure 3,) shows that, with the exception of C5, all stations in the DEA yielded higher abundances/hr than the CCZ. The highest numbers of individuals/hr were collected at station D3. Overall, there is a moderate negative exponential correlation with increasing deployment times ( $R = 0.67, p = 0.01$ ).

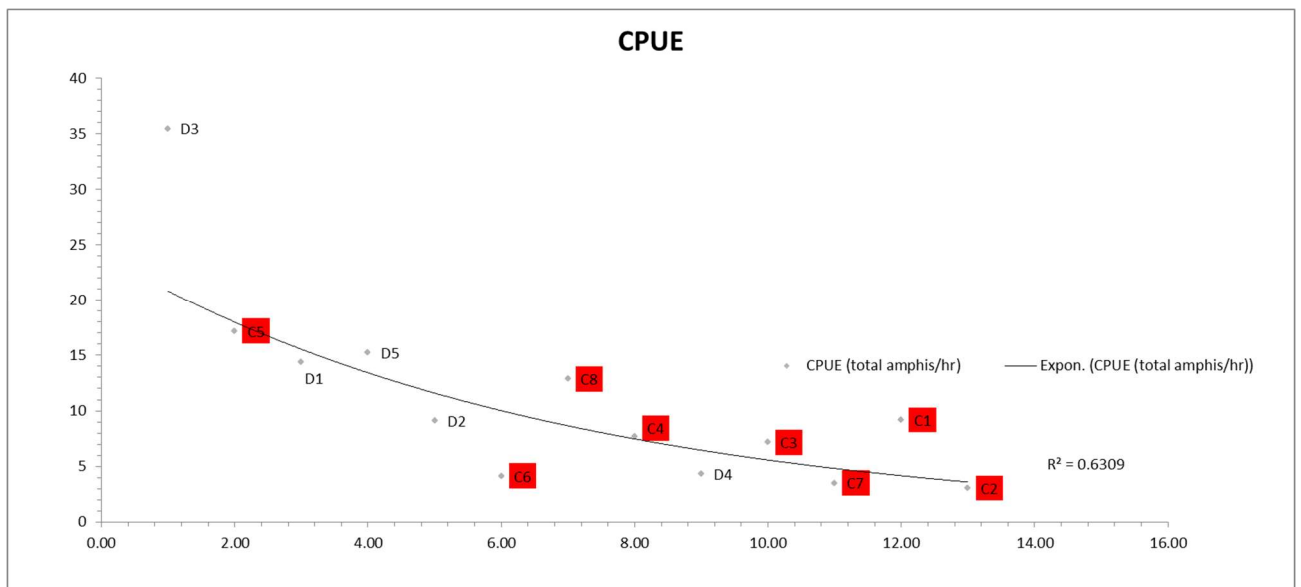

338  
339  
340  
341  
342  
343  
344  
345  
346  
347  
348  
349

**Figure 3: Catch Per Unit Effort (CPUE) illustrating the correlation between sampling time and number of individuals collected. Only the > 15mm fraction was included here to estimate number of collected individuals.**

350  
351  
352  
353  
354  
355  
356

The rarefaction results (Figure 4) show that the curves for nine stations reach a plateau, indicating that sampling effort was sufficient to assess diversity levels. These include all CCZ stations except C7. In contrast, four of the five curves for the DEA (stations D1, D2, D4 and D5) are unsaturated.

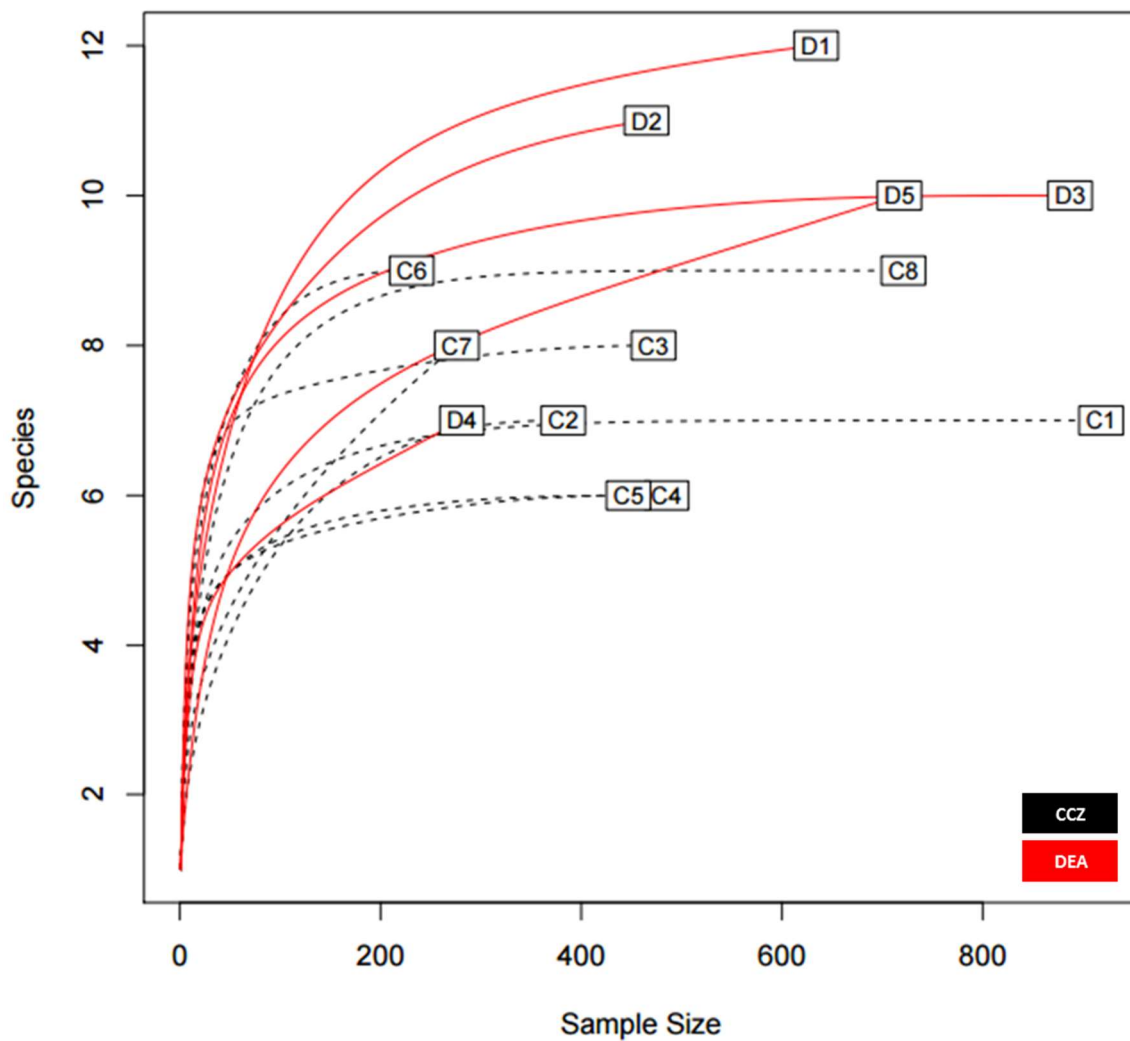

357  
358  
359  
360  
361  
362  
363

**Figure 4: Species rarefaction curves for each of the 13 trap stations across both areas, the Clarion-Clipperton fracture Zone and the DisCOL Experimental Area. Only individuals greater than 15 mm were considered here.**

364  
365  
366  
367  
368  
369  
370  
371  
372  
373  
374  
375  
376  
377  
378  
379  
380  
381  
382  
383  
384  
385  
386  
387  
388  
389  
390  
391  
392  
393  
394  
395  
396  
397

**Biodiversity**

Figures 5a and b show that the scavenging community in the CCZ is dominated by three species, *A. distinctus* (16%), *A. gerulicorbis* (18%) and *Paralicella caperesca* (31%), whereas, in contrast, the DEA scavenging community is dominated by a single species, *A. gerulicorbis*, accounting for almost 60% of all specimens. The Simpson Index ( $D$ ) for the entire CCZ area is (with 0.73), higher than the 0.616 that was calculated for the whole of the DEA area (Table 3). The biodiversity of each individual station was further explored (Table 3). In the CCZ, the lowest biodiversity was found at C3 and C6 ( $D = 0.23$ ) and the highest at C2 ( $D = 0.67$ ), respectively. In the DEA, the lowest biodiversity of  $D = 0.36$  was found at station D1 (the site of the actual disturbance) and just south of the disturbance site at D2 (0.21), while the highest biodiversity was observed at D5 ( $D = 0.61$ ) (Table 3).



398

399

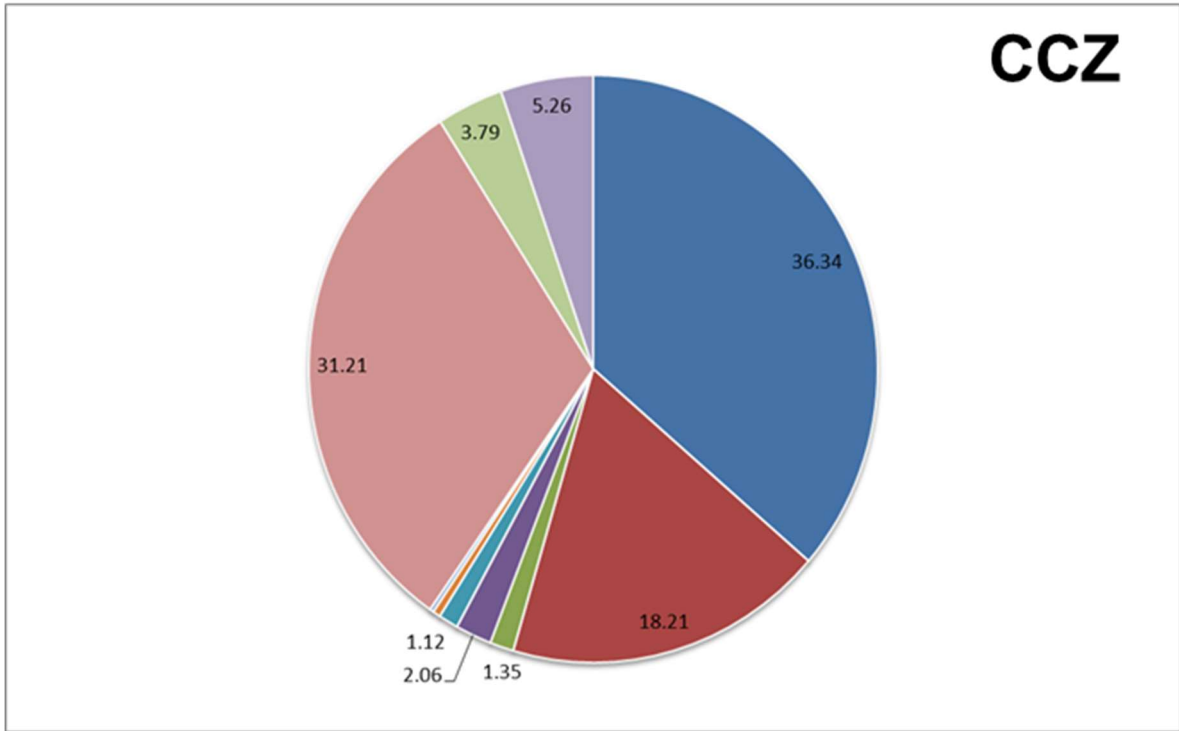

400

401

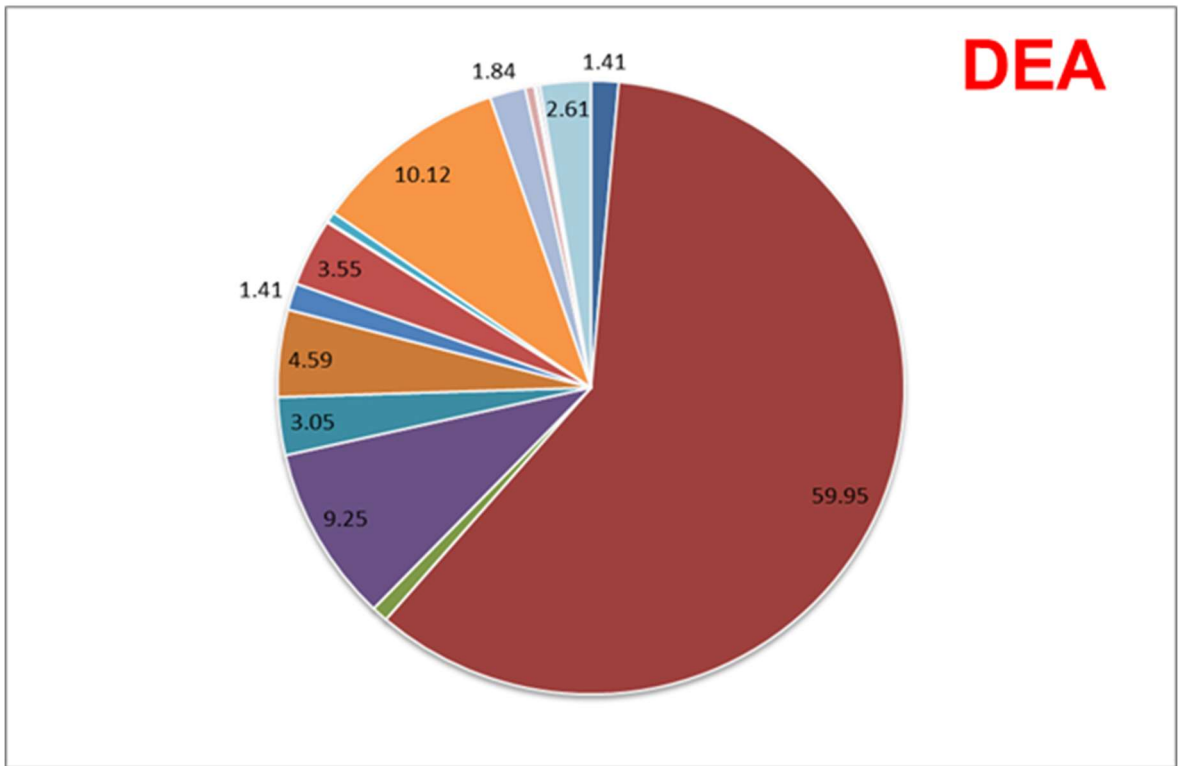

402

403

404

- *Abyssorchomene distinctus*
- *Abyssorchomene gerulicorbis*
- *Abyssorchomene* sp.
- *Eurythenes sigmiferus*
- *Eurythenes* sp. 1
- *Eurythenes* sp. 2 (aff. *gryllus*)
- *Eurythenes* sp. 3
- *Eurythenes* sp. 4 (aff. *magellanicus*)
- *Eurythenes* spp. nov.
- gen. aff. *Cleonardo*
- *Hirondellea* sp.
- *Paracallisoma* aff. *alberti*
- *Paralicella caperesca*
- *Parandania* sp.
- *Parandaniexis mirabilis*
- *Stephonyx* sp. nov. aff. *arabiensis*
- *Tectovallopsiopsis regelatus*
- *Valettietta gracilis*
- *Valettietta tenuipes*

405

406

407 **Figures 5a and b: Relative species abundances in the Clarion-Clipperton fracture Zone**

408 **and the DisCOL Experimental Area.** These abundances represent the greater than 15mm

409 fraction of the scavenging amphipod community only.

410

411

412

413

414

415

416

417

418

419

420

421

422 **Table 3: Comparison of biodiversity calculated using the Simpson Index (*D*), for the**  
 423 **Clarion-Clipperton fracture Zone and DisCOL Experimental Area, and *D* for each**  
 424 **station is shown for further comparisons within these areas.**

|                                                                   |      |
|-------------------------------------------------------------------|------|
| Simpson Index ( <i>D</i> ) whole Clarion-Clipperton Fracture Zone | 0.73 |
| Simpson Index ( <i>D</i> ) whole DisCOL Experimental Area         | 0.62 |
| C1 ( <i>D</i> )                                                   | 0.41 |
| C2 ( <i>D</i> )                                                   | 0.68 |
| C3 ( <i>D</i> )                                                   | 0.23 |
| C4 ( <i>D</i> )                                                   | 0.27 |
| C5 ( <i>D</i> )                                                   | 0.38 |
| C6 ( <i>D</i> )                                                   | 0.23 |
| C7 ( <i>D</i> )                                                   | 0.45 |
| C8 ( <i>D</i> )                                                   | 0.44 |
| D1 disturbed ( <i>D</i> )                                         | 0.36 |
| D2 ref 1 ( <i>D</i> )                                             | 0.21 |
| D3 ref 2 ( <i>D</i> )                                             | 0.38 |
| D4 ref 3 ( <i>D</i> )                                             | 0.44 |
| D5 ref 4 ( <i>D</i> )                                             | 0.61 |

425  
 426  
 427  
 428  
 429  
 430  
 431  
 432  
 433

434 **Species composition**

435

436 The NMDS shows that the communities of the two basins are clearly separated (ANOSIM:  $p$   
437 = 0.002); Figure 6). The disturbed area in the DEA (D1) is showing a clear difference to the  
438 four reference areas (D2 - 5). When the communities between the two basins are compared,  
439 D2 appears to be most similar to the CCZ community, and more specifically to C6, C7 and  
440 C8. The reliability of the data ranking is supported by a low stress value of 0.01.

441

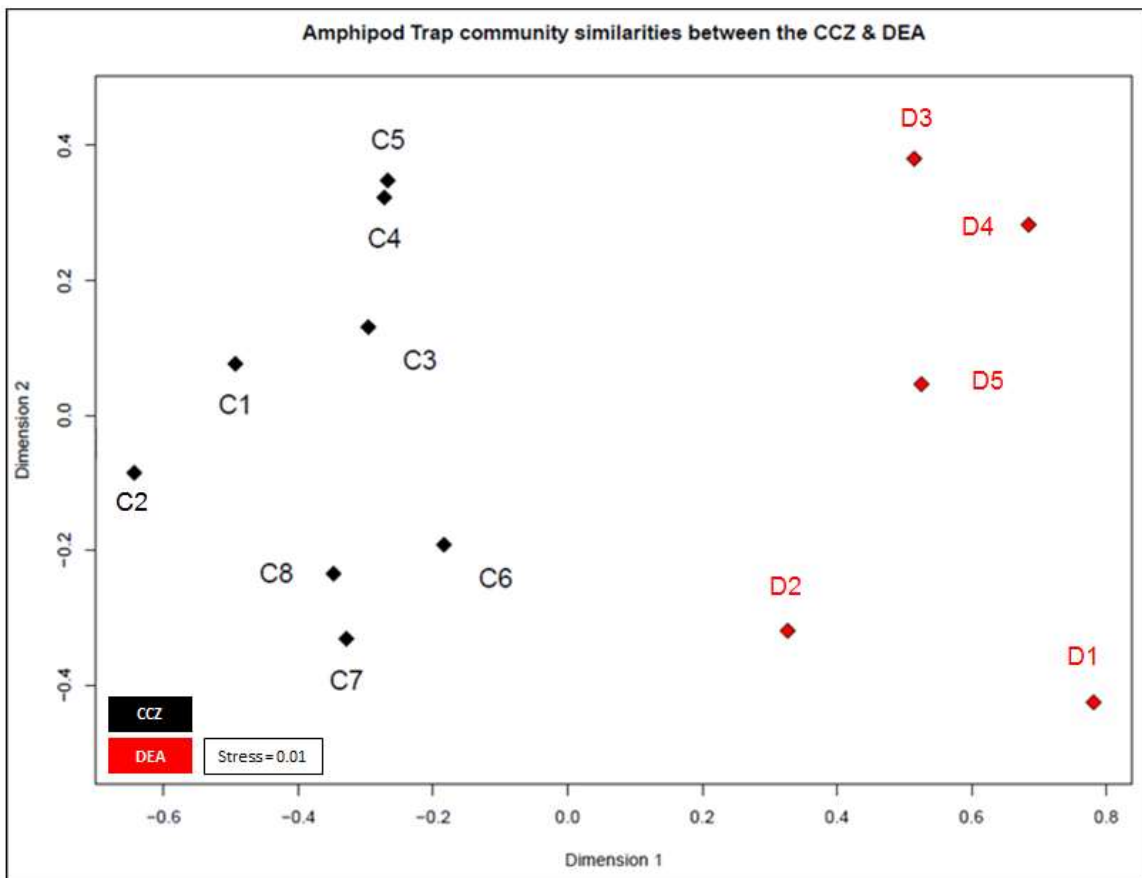

442

443 **Figure 6** : NMDS plot showing the beta biodiversity (dis/similarities) for each of the thirteen  
444 amphipod trap sampling stations associated with the two basins, Clarion-Clipperton fracture  
445 Zone (CCZ) (black) and the DisCOL Experimental Area (DEA) (red). Data are supported by  
446 a low stress value of 0.01.

447

448

## 449 Discussion

450

### 451 *An unexplored ecosystem*

452 Although the most recent and comprehensive analysis of the Animal diversity of the World's  
453 oceans estimates a total of less than a million species over all depths (Appeltans et al. 2012),  
454 it is not currently known how many species actually inhabit the deep-sea. Regarding  
455 amphipods, only 328 benthic, demersal and benthopelagic species, belonging to 144 genera  
456 and 39 families. Over 7000 marine amphipod species have been found below 2000 m. These  
457 numbers are reduced to 173 known species, 87 genera and 37 families at depths below 3000  
458 m, and 100 known species, 66 genera and 31 families are known to occur below 4000 m  
459 (Vader 2005; Brandt et al, 2012).

460

### 461 *Lysianassoidea and their biogeography*

462

463 The superfamily Lysianassoidea constitutes an important part of the abyssal amphipod fauna.  
464 Also, in our sampling, lysianassoid amphipods were collected in large numbers (99% of the  
465 samples taken in both basins). As a superfamily, they comprise 23% of all the species found  
466 below 2000 m, 35% of the species found below 3000 m and 31% of the species found below  
467 4000 m (Brandt et al. 2012).

468

469 Many species in the Lysianassoidea occur in multiple abyssal basins, and some even have  
470 worldwide distributions (Thurston 1990). Despite the Ocean Biogeographic Information  
471 System (OBIS) database containing 615,650 records of Amphipoda, many of these are shelf  
472 or pelagic species, with very few records from the CCZ and DEA (OBIS, 2017). Here, we  
473 provide new data for the known bathymetric range of the seven amphipods which we have  
474 identified to species level (*Abyssorchomene distinctus*, *Abyssorchomene gerulicorbis*,  
475 *Eurythenes sigmiferus*, , *Paralicella caperesca*, *Parandaniexis mirabilis*, *Tectovallopsis*  
476 *regelatus* & *Valettietta tenuipes*) (Table 2b). In addition, we have found two possibly new  
477 species of *Eurythenes*, previously not known from these basins, which we plan to analyse  
478 further in the future.

479 While we only sampled *Hirondellea* sp. and *Valettietta tenuipes* in the CCZ, and *Eurythenes*  
480 sp. 1- 4, gen. aff. *Cleonardo*, *Parandaniexis mirabilis*, *Stephonyx* sp. nov. aff. *arabiensis*, and

481 *Tectovallopsis regelatus* only in the DEA, we cannot conclude based on the current data only  
482 if these species are unique to their respective basins without confirming these distribution  
483 patterns with additional sampling campaigns.

484

485

#### 486 ***Catch Per Unit Effort***

487

488 Despite the sampling campaign in the CCZ being twice as long as the DEA, the number of  
489 individuals/species collected does not correlate positively with deployment effort. We assume  
490 that this is rather an effect of abiotic and organic factors, such as the productivity-driven  
491 gradients in the CCZ, which decrease from East-West and from North-South (Hannides &  
492 Smith, 2003). This lack of correlation is supported by our findings for station C2 (with the  
493 shortest deployment time), which shows the highest Simpson Index of all thirteen stations ( $D$   
494 = 0.67). Further evidence comes from the patterns visualised in Figure 3, which shows a  
495 correlation of  $R = 0.67$  for Catch Per Unit Effort (CPUE) and deployment times.

496

#### 497 ***Biodiversity within basins***

498

499 Figures 5a & b show clearly that the DEA scavenging community has reduced abundances of  
500 all species including *A. distinctus* (1%) and *P. capresca* (7%), and is now dominated by a  
501 single species, *A. gerulicorbis*, accounting for 60% of the DEA community. This indicates an  
502 interesting resilience and flexibility in the latter species. Similar patterns have been observed  
503 in Potter Cove (Seefeldt et al. 2017), where following glacial retreat, a change in  
504 sedimentation rates led to the dominance of a single amphipod scavenging species,  
505 *Cheirimedon femoratus*.

506

507 Although the assemblage of the two basins has some overlap in its amphipod diversity (as is  
508 exemplified by the nine shared morphotypes), the sampling stations (and the two basins) are  
509 heterogeneous concerning species compositions of the subdominant and rarer species

510

511 Thus, we can observe some negative influence (possibly attributed to the disturbance in the  
512 DEA) on the scavenging amphipod community. This reduced biodiversity is reflected in the  
513 higher Simpson Index ( $D$ ) for the CCZ (0.73) as compared to the DEA ( $D = 0.62$ ; Table 3).

514

515 To explore whether this reduced diversity in the DEA was truly a result of the simulated  
516 disturbance,  $D$  was also calculated for each sampling station within each basin (Table 3).  
517 In the CCZ, the APEI (C8) shows a moderate level of biodiversity ( $D = 0.44$ ), indicating that  
518 it is not optimally-placed for representing the biodiversity of the scavenging amphipod  
519 community of the CCZ. Additionally, this pre-existing lower biodiversity (in comparison to  
520 the contractor claim areas), indicates that the APEI may not serve well as a refugium for  
521 amphipods post-disturbance. However, due to the fact that only one of the eight APEIs have  
522 been investigated thus far, this APEI along with the remaining eight APEIs would need to be  
523 (re-) sampled.

524

525 Within the DEA, the lowest biodiversities are observed at the site of the disturbance (D1) and  
526 south of it (D2; Table 3), indicating that the reduced biodiversity in the DEA could indeed be  
527 caused by the simulated disturbance in 1989 (Thiel, 1992).

528

529 The highest abundances in the DEA were collected from station D5 ( $n = 1242$ ); this station  
530 also has the highest Simpson Index within the DEA ( $D = 0.61$ ) (Table 3). Side-scan sonar  
531 imaging shows a seamount range to the North West (NW) of the disturbed area (D1)  
532 (Appendix 3). Although the relief change is only 150m, the range extends laterally for several  
533 kilometres (SO242-1 Cruise report, 2016) hampering dispersal across barriers such as sills,  
534 canyons and ridges (Smith, et al. 2006; Blankenship et al. 2006; Etter et al. 2011). However,  
535 recent studies have shown that due to their mobile nature, geographic isolation alone would  
536 not pose a true barrier to benthic-pelagic amphipod species (Havermans, 2016; Ritchie et al.  
537 2017), and thus, cannot explain why such a high number of large scavenging individuals was  
538 collected at station D5.

539

540

### 541 *Community similarities*

542

543 Scavenging amphipods are resilient and dispersive, but most importantly, they are highly  
544 mobile (Ingram and Hessler 1983; Lörz et al. 2018). Often driven by their search for erratic  
545 deposited feeding opportunities (Smith et al. 1989), they are probably less constrained by  
546 local environmental abiotic conditions and seafloor topography.

547

548 Beta diversity can be regarded as the dissimilarities in species composition between spatially  
549 different communities. As an indication for beta biodiversity, the NMDS (Figure 6) shows a  
550 significant separation in the similarity index between the two basins (ANOSIM  $p = 0.002$ ).  
551 However, despite the dispersive and resilient nature of scavenging amphipods, their  
552 biodiversity appears to have been affected by the disturbance experiment as evidenced by the  
553 NMDS (Figure 6), where the disturbed area (D1) and the area closest to it (D2) are separated  
554 from the remaining three reference sites (D3, D4 and D5).

555

556 In the CCZ, stations C1, C2, C3, C4 and C5 form one cluster in the NMDS (Figure 6), and  
557 stations C6, C7 and C8 a second cluster. The CCZ is a geomorphologically very  
558 heterogeneous region, with seamounts of 200 m altitude running from north-south. A barrier  
559 of this height would be expected to affect sedimentation rates, nodule presence and currents.  
560 Furthermore, the difference in depth from the eastern edge (3950m) and the western edge  
561 (5150 m) is more than 1200 m. These combined factors very likely give rise to different  
562 trends in species composition (Glover, et al. 2015). However, since it has been established  
563 that benthic-pelagic amphipods are less sensitive to such barriers (Havermans, 2016), at this  
564 stage, other biotic (e.g. the productivity gradient) and abiotic factors causing this separation  
565 cannot be excluded as alternative explanations.

566

### 567 *Dispersal and connectivity*

568

569 Whilst the NMDS (Figure 6) illustrates a visual separation of the two basins, there is also  
570 some similarity in the amphipod fauna between the two areas, (as is obvious by the nine  
571 shared species), indicating that the dispersal extent for these nine species might range up to at  
572 least 3000 km. However, this hypothesis will need to be confirmed with subsequent  
573 molecular analyses.

574

575

576 Abyssal amphipods have been shown to be able to travel actively at speeds of almost 4  
577 cm/sec (Laver, 1985), even at temperatures as low as 3°C (Kankaanpää et al. 1995). It is  
578 obvious that they are sufficiently strong to swim up weak currents since they can be found  
579 several hundred meters above the seafloor searching pelagically for mates (e.g. *Eurythenes*  
580 *gryllus* occurring up to 1800 m above the seafloor) (Thurston 1990; Havermans et al. 2013)  
581 or following food-falls (Baldwin and Smith 1987).



582

583 However, it is apparent that the dispersal of abyssal amphipods is not always contingent on  
584 current direction, but also on passive dispersal. Amphipods can also be carried passively over  
585 long distances by stronger currents e.g. (the circumpolar current of the Southern Ocean)  
586 (Laver et al. 1985), but even weaker deep-sea currents have been suggested as a mechanism  
587 for deep-sea dispersal of amphipods (e.g. *Eurythenes gryllus* (Schüller and Ebbe 2007)). This  
588 coupled with their ability to follow odour-plumes (Ide et al. 2006; Premke, 2003),  
589 significantly increases the probability and extent of their dispersal (Conlan 1991; Highsmith,  
590 1985).

591

592 The lack of a clear dispersal pattern is obvious from Figure 6, where station D2 is the station  
593 clustering closest with the CCZ basin in terms of species composition despite the fact that  
594 station D5 is geographically the shortest distance away from the CCZ.

595

596 Recent research on *Eurythenes gryllus* has demonstrated that it thrives in every ocean with a  
597 wide (pelagic – hadal) depth range. However, assumptions that individual morphotypes of  
598 this species belong to the same genetic lineage have been challenged (Havermans et al. 2013  
599 & Havermans, 2016). Ritchie et al. (2016) demonstrated with microsatellite markers  
600 heterozygote deficiency in *Paralicella tenuipes*, which they attributed to cryptic diversity. It  
601 is likely that the connectivity of the nine species we observed as being shared between the  
602 CCZ and DEA (based on traditional morphological methods), can be explained by the  
603 presence of one or more cryptic amphipod species, which will have to be tested by future  
604 molecular research.

605

606 Unfortunately, in the absence of data on deep-sea currents in the study area, especially  
607 between the CCZ and DEA, it is not yet possible to fully explain the drivers and mechanisms  
608 of amphipod dispersal between these particular basins.

609

### 610 *The DisCOL Experimental Area as a proxy*

611

612 Higher abundances of scavenging amphipods were collected from the CCZ (3932  
613 individuals) as opposed to the DEA (2984 individuals). Yet, we have identified more  
614 morphotypes in the DEA (18) than in the CCZ (10), indicating that the DEA is more  
615 speciose, and thus, more biodiverse.

616

617 Although the DEA is more speciose, many of its morphotypes were collected in low  
618 abundances, with several of these being singletons or doubletons (collected from one or two  
619 sampling stations only). This is reflected in the rarefaction curves (Figure 4), which indicate  
620 thorough sampling in the CCZ with all but station C7 reaching asymptotes. In contrast, four  
621 stations in the DEA (D1, D2, D4 and D5) are **unsaturated. This pattern suggests firstly** that  
622 the less abundant species which are present at fewer stations only may not necessarily be rare  
623 species and secondly, that there could be as yet undetected biodiversity in the DEA.

624 Therefore, the effects of mining impact could be even more pronounced than we observed in  
625 this study. However, as the seafloor environment is subject to seasonal fluctuations (Billett et  
626 al. 1983), it is hard to predict exactly what the effects will be at this stage.

627

628 Our preliminary (basin-scale) comparison of the scavenging communities of the two study  
629 areas shows that even if the DEA is a small-scale disturbance experiment, it is a very diverse  
630 area. Thus, the DEA is a well-chosen site for monitoring the impacts of disturbance and  
631 instrumental in its role as a proxy to assess impending mining activities in the CCZ.

632

633

634

### 635 ***Future research***

636

637 At several stations in both basins, we collected amphipods in very high abundances (C1, C8,  
638 D3 & D5) (Table 2b). Since biotic production is contingent on the sinking flux of particles  
639 from the euphotic zone (Sweetman, 2017), the biodiversity differences at each of the thirteen  
640 stations could be driven by Particulate Organic Carbon (POC) or erratic whale-falls (Smith et  
641 al. 1989). **However, not all feeding behaviour of scavenging amphipods is based on**  
642 **opportunistic or erratic availability of nutrients (Havermans & Smetacek, 2018). During**  
643 **future sampling campaigns, the POC of these areas should be monitored, along with**  
644 **experiments on different types of food-fall in addition to obtaining side-scan sonar and**  
645 **abiotic data. This will provide a more comprehensive view of the food types required for**  
646 **these species to thrive in the deep sea.**

647

648 It is not clear from our results whether substrate type (i.e. nodule/non-nodule) has any effect  
649 on the amphipod communities (Smith and Demopoulos, 2003) since this kind of data is only

650 available for stations D3 and D4. To answer this question, resampling of the study areas in  
651 combination with an Ocean Floor Observation System (OFOBS) (video/camera) is required.

652

653 Although our study only addresses the scavenging amphipod species longer than 15 mm, we  
654 already find indications for a disturbance effect in the DEA. It is obvious that scavenging  
655 amphipods are only one of several **bentho-pelagic indicator groups. Other truly** benthic  
656 groups such as sponges or less dispersive amphipods (e.g. collected by epibenthic sledge  
657 (EBS)) may demonstrate an even more pronounced impact of mining activities and should be  
658 investigated in future studies.

659

660 With the application of molecular techniques to identify cryptic species (Delić et al, 2017),  
661 more realistic estimates of biodiversity can be obtained (Schön et al. 2012), improving our  
662 current knowledge of the biodiversity of this area. If these improved estimates of biodiversity  
663 also include cryptic species, it is possible that the biological impact of manganese nodule  
664 mining on amphipod and other deep-sea faunal communities may turn out to be even higher.

## 665 **Conclusions**

666

667 In summary, this study on the scavenging amphipod community of two abyssal oceanic  
668 basins has demonstrated that amphipods are present in high abundances across the CCZ and  
669 DEA, with nine shared species and some species possibly being unique to their respective  
670 basin.

671 Our results have indicated that the simulated mining experiment probably had an impact on  
672 the biodiversity of these scavenging amphipods, as demonstrated by the low *D* of the DEA  
673 overall, at the disturbance site itself (D1), and the 60% dominance of *A. gerulicorbis* in this  
674 region.

675 Given the scarcity of sampling and industry experience of marine habitats at these depths, the  
676 formulation of effective regulations is challenging (International Seabed Authority, 2017).  
677 Nonetheless, our study provides the first results on possible effects of disturbance activities  
678 on the abyssal amphipod biodiversity of deep-sea basins.

679 **Sample and data availability**

680 Biological samples pertaining to this manuscript are stored at the Royal Belgian Institute of Natural  
681 Sciences, and the data discussed in the manuscript are submitted to PANGEA.

682 **Acknowledgements**

683

684 The authors would like to acknowledge the Belgian Science and Policy Office (BELSPO) and the  
685 German Federal Ministry of Research and Education for funding. We would also like to thank the  
686 crew of the Research Vessel “Sonne”, the University of Ghent (Ghent, Belgium) and Zohra  
687 Elouaazizi (Brussels, Belgium) for help in the lab. This study would not have been possible without  
688 their support.

689

690

691

692

693

694

695

696

697

698

699

700 **References**

701

702 Appeltans, W., Boxshall, G., Bouchet, P., Vanhoorneb., Decock, W., Warren, A., Collinsa.,  
703 Kroh A., Schmidt–Rhaesa, A., Berta, A., Barber, A., Todaro, A., Gittenberger, A.,  
704 Hoeksema, B., Swalla, B., Neuhaus, B., Hayward, B., Self–Sullivan, C., Fransen, C.,  
705 Messing, C., Erséus, C., Emig, C., Boyko, C., Mah, C., Millsc., Nielsen, C., Jaume,  
706 D., Fautin, D., Domning, D. P., Gibson, D., Lazarus, D., Gordon, D., Opresko, D.,  
707 Schwabe, E., Mac–Pherson E., Thuesen, E., Dahdouh–Guebas, F., Anderson, G.,  
708 Poore, G., Williams, G., Walker–Smith, G., Read, G., Lambert, G., Paulay, G.,  
709 Segers, H., Furuya, H., Bartsch, I., Van Der Land, J., Reimer, J. D., Vanaverbeke, J.,  
710 Saiz–aiz, Saike, J., Sair, J. D., Pilger, J., Norenburg, J., Kolb, J., Schnabel, K. E.,  
711 Meland, K., Fauchald, K., Cheng, L., Van Ofwe–Gen L., Błażewicz–Paszkowycz,  
712 M., Rius, M., Curini–Galletti, M., Schotte, M., Tasker, M. L., Angel, M. V., Osawa,  
713 M., Longshaw M., Guiry, M., Bailly, N., De Voogd, N., Bruce N., Shenkar, N.,  
714 Garcia–Alvarez, O., Mclaughlin, P., Kirk, P., Davie, P., Ng, P. K. L., Schuchert P.,  
715 Uetz P., Bock P., Pugh P., Lemaitrer., Kristensen R., Van Soestr., Bray, R., Bamber,  
716 R. N., Da Rocha, R. M., Hopcroft R., Stöhr, S., De Grave, S., Gerken, S., Gofas, S.,  
717 Tyler, S., Ahyong, S., Wilson, S., Brandao S. N., Koenemann, S., Feist, S., Cairns, S.,  
718 Timm, T., Cribb, T., Molodtsova, T., Chan, T.–Y., Iseto, T., Artois, T., Scarabino, V.,  
719 Siegel, V., Eschmeyer, W., Hummon, W., Perrin W., Sterrer, W., Hernandez, F.,  
720 Mees J., Costello, M. J.: The Magnitude of Global Marine Biodiversity, *Curr. Biol.*,  
721 22, 2189–2202, 2012.

722

723 Baldwin, R. J. & Smith, K. L. Jr.: Temporal variation in the catch rate, length, color, and sex  
724 of the necrophagus amphipod, *Eurythenes gryllus*, from the central and eastern North  
725 Pacific, *Deep Sea Res. (part 1 Oceanogr. Res. Pap.)*, 34, 425–439, 1987.

726

727 Barnard, J. L.: Gammaridean Amphipoda from depth of 400 to 6000 m, *Galathea. Rep.*, 5,  
728 23–128, 1961.

729

730 Barnard, J. L. & Karaman, G.: The Families and Genera of Marine Gammaridean Amphipoda  
731 (Except Marine Gammaroids), *Rec. Aust. Mus. Suppl.* 13., 1–866, 1991.

732

733 Belyaev, G. M.: Deep-Sea Ocean Trenches and Their Fauna. Nauka Publishing House,  
734 Moscow, 385 pp, 1989.  
735

736 Billett, D. S. M., Lampitt, R. S., Rice, A. L. & Mantoura, R. F. C.: Seasonal sedimentation of  
737 phytoplankton to the deep-sea benthos, *Nature*, 302, 520–522. 1983.

738 Blankenship, L. E. & Levin, L. A.: Extreme food webs: Foraging strategies and diets of  
739 scavenging amphipods from the ocean's deepest 5 kilometers, *Limnol. Oceanogr.*, 52,  
740 1685–1697, 2007.  
741

742 Blankenship, L. E., Yayanos, A. A., Cadien, D. B., and Levin, L. A.: Vertical zonation  
743 patterns of scavenging amphipods from the Hadal zone of the Tonga and Kermadec  
744 Trenches, *Deep-Sea Res. Pt. I*, 53, 48–61, doi:10.1016/j.dsr.2005.09.006, 2006.  
745

746 Brandt, A., Gooday A. J., Brix S. B., Brökeland, W., Cedhagen, T., Choudhury, M.,  
747 Cornelius, N., Danis, B., De Mesel, I., Diaz R. J., Gillan D. C., Ebbe B., Howe J.,  
748 Janussen, D., Kaiser, S., Linse, K., Malyutina, M., Brandao, S., Pawlowski, J. &  
749 Raupach, M.: The So Deep Sea: First Insights Into Biodiversity And Biogeography.  
750 *Nature*, 447, 307–311, 2007.  
751

752 Bray, J. R. & J. T. Curtis.: An ordination of upland forest communities of southern  
753 Wisconsin, *Ecol. Mono.*, 27, 325–349, 1957.  
754

755 Brenke, N.: An epibenthic sledge for operations on marine soft bottom and bedrock, *Mar.*  
756 *Technol. Soc. J.*, 39, 10–21, 2005. hdl.handle.net/10.4031/002533205787444015.  
757

758 Carmona, L., Malaquias, M. A. E., Gosliner, T. M., Pola, M. & Cervera, J. L. Amphi-Atlantic  
759 distributions and cryptic species in Sacoglossan sea slugs, *J. Molluscan Stud.*, 77,  
760 401–412, 2011.  
761

762 Conlan K. E.: Precopulatory mating behavior and sexual dimorphism in the amphipod  
763 Crustacea, *Hydrobiologia*, 223, 255–282, 1991.  
764

765 Delić, T., Trontelj, P., Rendoš, M. & Fišer., C.: The importance of naming cryptic species  
766 and the conservation of endemic subterranean amphipods. *Sci. Rep.*, 7, 3391, 2017.  
767 <https://doi.org/10.1038/s41598-017-02938-z>  
768  
769

770 Etter, R. J., Boyle, E. E., Glazier, A., Jennings, R. M., Dutra, E. & Chase. M. R.  
771 “Phylogeography of a Pan-Atlantic Abyssal Protobranch Bivalve: Implications for  
772 Evolution in the Deep Atlantic.” *Molecular Ecology* 20 (4): 829–843, 2011.  
773 doi:<http://dx.doi.org/10.1111/j.365-294X.2010.04978.x>.  
774

775 France, D. & Kocher, T.: Geographic and bathymetric patterns of mitochondrial 16S rRNA  
776 sequence divergence among deep-sea amphipods, *Eurythenes gryllus*. *Mar. Biol.*, 126,  
777 633–643, 1996.  
778

779 Futuyma, D. J.: *Evolutionary Biology*, ed. 3. Sinauer Associates, Sunderland MA, 751 pp.,  
780 1998.  
781

782 Gage, J. D. & Tyler, P. A.: *Deep-Sea Biology: a natural history of organisms at the deep-sea*  
783 *floor*, Vol. Cambridge University press, Cambridge, 1991.  
784

785 German C. R., Ramirez-Llodra, E., Baker, M. C., Tyler, P. A., and the Chess Scientific  
786 Steering Committee.: *Deep-Water Chemosynthetic Ecosystem Research during the*  
787 *Census of Marine Life Decade and Beyond: A Proposed Deep Ocean Road Map*,  
788 *PLoS ONE*, 6, 2011. doi:10.1371/journal.pone.0023259.  
789

790 Glover, A., Paterson, G., Bett, B., Gage, J., Sibuet, M., Sheader, M., Hawkins, L.: Patterns in  
791 polychaete abundance and diversity from the Madeira Abyssal Plain, northeast  
792 Atlantic. *Deep Sea Res. (part 1 Oceanogr. Res. Pap.)*, 48, 217–236, 2001.  
793

794 Glover, A., Smith, C. R., Paterson, G. J. L., Wilson, G. D. F., Hawkins, L. & Sheader, M.:  
795 Polychaete species diversity in the central Pacific abyss: local and regional patterns,  
796 and relationships with productivity, *Mar. Ecol. Prog. Ser.*, 240, 157–170, 2002.  
797

798 Gotelli, N. J. & Colwell, R., K.: Quantifying Biodiversity: Procedures and Pitfalls in the  
799 Measurement and Comparison of Species Richness.”, *Ecol. Lett.*, 4, 379–91, 2001.  
800 doi:10.1046/j.1461-0248.2001.00230.  
801

802 Hannides, A., Smith, C. R.: The northeast abyssal Pacific plain. In: *Biogeochemistry of*  
803 *Marine Systems*, K. B. Black and G. B Shimmield, eds., CRC Press, Boca Raton,  
804 Florida, 208-237, 2003.  
805

806 Havermans, C.: Have we so far only seen the tip of the iceberg? Exploring species diversity  
807 and distribution of the giant amphipod *Eurythenes*, *Biodiversity*, 2016.  
808 DOI: 10.1080/14888386.2016.1172257  
809

810 Havermans, C & Smetacek, V. Bottom-up and top-down triggers of diversification: A new  
811 look at the evolutionary ecology of scavenging amphipods in the deep sea. *Progress in*  
812 *Oceanography*, 164, 37-51, 2018.  
813

814 Havermans, C., Sonet, G., d'Udekem d'Acoz, C., Nagy, Z. T., Martin, P., Brix, S., Riehl, T.,  
815 Agrawal, S. & Held, C.: Genetic and morphological divergences in the cosmopolitan  
816 deep-sea amphipod *Eurythenes gryllus* reveal a diverse abyss and a bipolar species.  
817 *PLoS ONE*, 8, e74218, 2013.  
818

819 Held, C. & Wägele, J. W.: Cryptic speciation in the giant Antarctic isopod *Glyptonotus*  
820 *antarcticus* (Isopoda: Valvirfera: Chaetiliidae), *Sci. Mar.* 69 (Suppl. 2), 175–181,  
821 2005.  
822

823 Highsmith, R.: Floating and algal rafting as potential dispersal mechanisms in brooding  
824 invertebrates, *Mar. Ecol. Prog. Ser.*, 25, 169–179, 1985.  
825

826 Hilário, A., Metaxas, A., Gaudron, S. M. ,Howell, K. L., Mercier, A., Mestre, N. C., Ross, R.  
827 E. ,Thurnherr, A. M. & Young, C.: Estimating dispersal distance in the deep  
828 sea:challenges and applications to marine reserves, *Front. Mar. Sci.*, 2, 2015.  
829 doi:10.3389/ fmars.2015.00006.



830 Ide, K., Takahashi, K., Nakano, T., & Minoru, S. & Omori, M. Chemoreceptive foraging in a  
831 shallow-water scavenging lysianassid amphipod: Role of amino acids in the location  
832 of carrion in *Scopelocheirus onagawae*. Marine Ecology-progress Series, 2006.  
833 MAR ECOL-PROGR SER. 317. 193-202. 10.3354/meps317193.  
834  
835 International Seabed Authority. A Discussion Paper on Developing a Regulatory Framework  
836 for Mineral Exploitation in the Area (Env. Matt.), 1–102, 2017.  
837  
838 Kankaanpää, H., Laurén, M., Mattson, M. & Lindström, M.: Effects of bleached kraft mill  
839 effluents on the swimming activity of *Monoporeia affinis* (Crustacea, Amphipoda)  
840 Lindström, Chemosphere, 31, 4455–4473, 1995.  
841  
842 Laver, M. B., Olsson, M. S., Edelman, J. L. & Smith K. L. Jr.: Swimming rates of scavenging  
843 deep-sea amphipods recorded with a free-vehicle video camera. Deep-Sea Res. II,  
844 32, 1135–1142, 1985.  
845  
846 Lester, S. E., Ruttenberg, B. I., Gaines, S. D. & Kinlan B. P.: The relationship between  
847 dispersal ability and geographic range size. Ecol. Lett, 10, 745–758, 2007.  
848  
849 Levin, L. A., Etter, R.J., Rex, M. A., Gooday, A. J., Smith, C. R., Pineda, J., Stuart, C. T.,  
850 Hessler, R. R. & Pawson, D.: Environmental influences on regional deep-sea species  
851 diversity, Annu. Rev. Ecol. Evol. Syst., 32, 51–93, 2001.  
852  
853 Liow, L. H.: Does versatility as measured by geographic range, bathymetric range and  
854 morphological variability contribute to taxon longevity?, Glob. Ecol. Bio., 16, 117–  
855 128, 2007.  
856  
857 Lodge, M., Johnson, D., Le Gurun, G., Wengler, M., Weaver, P. & Gunn, V.: Seabed mining:  
858 International Seabed Authority environmental management plan for the Clarion–  
859 Clipperton Zone. A partnership approach, Mar. Pol., 49, 66–72, 2014.  
860  
861 Lonsdale, P.: Clustering of suspension-feeding macrobenthos near abyssal hydrothermal  
862 vents at oceanic spreading centers, Deep-Sea Res., 24, 857–863, 1977.

863 Lörz A-N, Jażdżewska AM, Brandt A. A new predator connecting the abyssal with the hadal  
864 in the Kuril-Kamchatka Trench, NW Pacific. *Costello M, ed. PeerJ*. 2018;6:e4887.  
865 doi:10.7717/peerj.4887.  
866  
867  
868 Managing Impacts of Deep Sea Resource Exploitation (MIDAS) Summary Report:  
869 Biodiversity in the Clarion-Clipperton Zone, 1–2, 2016.  
870  
871 McClain, C. R. & Hardy, S. M.: The dynamics of biogeographic ranges in the deep sea, *Proc.*  
872 *Roy. Soc. B: Bio. Sci.*, 277, 3533–3546, 2010.  
873  
874 Narahara-Nakano, Y., Nakano, T. & Tomikawa, K. Deep-sea amphipod genus *Eurythenes*  
875 from Japan, with a description of a new *Eurythenes* species from off Hokkaido  
876 (Crustacea: Amphipoda: Lysianassoidea), *Marine Biodiversity*, 1867-1616, 2017. *Mar*  
877 *Biodiv* DOI 10.1007/s12526-017-0758-4  
878  
879 Paull, C. K., Hecker, B., Commeau, R., Freeman-Lynde, R. P., Neumann, C., Corso, W. P.,  
880 Golubic, S., Hook, J. E., Sikes, E. & Curray, J.: Biological communities at the Florida  
881 escarpment resemble hydrothermal vent taxa, *Science*, 226, 965–967, 1984.  
882 Premke K, Muyakshin S, Klages M & Wegner J. Evidence for long-range chemoreceptive  
883 tracking of food odour in deep-sea scavengers by scanning sonar data. *J Exp Mar Biol*  
884 *Ecol*, 285:283–294, 2003.  
885  
886 R Core Team. R: A language and environment for statistical computing. R Foundation for  
887 Statistical Computing, Vienna, Austria. ISBN 3-900051-07-0, 2013.  
888 URL <http://www.R-project.org/>.  
889  
890 Ramirez-Llodra, E., Brandt, A., Danovaro, R., De Mol, B., Escobar, E., German, C. R.,  
891 Levin, L. A., Martinez Arbizu, P., Menot, L., Buhl-Mortensen, P., Narayanaswamy,  
892 B. E., Smith, C. R., Tittensor, D. P., Tyler, P. A., Vanreusel, A. & Vecchione, M.:  
893 Deep, diverse and definitely different: unique attributes of the world's largest  
894 ecosystem, *Biogeosciences*, 7, 2851–2899, 2010.  
895

896 Ramirez-Llodra, E., Tyler, P. A., Baker, M. C., Bergstad, O. A., Clark, M. R. & Escobar, E.:  
897 Man and the last great wilderness: human impact on the Deep Sea, PLoS ONE, 6,  
898 2011. doi:10.1371/journal.pone.0022588.  
899

900 Rex, M. A., Stuart, C. T., Hessler, R., R., Allen, J. A., Sanders, H. L. & Wilson, G. D. F.:  
901 Global-scale latitudinal patterns of species diversity in the deep-sea benthos, Nature,  
902 365, 636–639, 1993.

903 Ritchie, H., Jamieson, A. J. & Piortney, S. B. Isolation and Characterization of Microsatellite  
904 DNA Markers in the Deep-Sea Amphipod *Paralicella tenuipes* by Illumina MiSeq  
905 Sequencing, Journal of Heredity, 367 – 371, 2016.  
906

907 Sanders H. L.: Marine benthic diversity: a comparative study, Am. Nat., 102, 243–282, 1968.  
908

909 Schön I, Pinto R. L., Halse, S., Smith, A. J. & Martens, K.: Cryptic Species in Putative  
910 Ancient Asexual Darwinulids (Crustacea, Ostracoda), PLoS ONE, 7, e39844.  
911 doi:10.1371/journal.pone.0039844. 2012.  
912

913 Schulenberger, E. & Barnard, J. L.: Clarification of the Abyssal Amphipod, *Paralicella*  
914 *tenuipes* Chevreux, Crustaceana, 31, 267–274, 1976.  
915

916 Schüller, M. & Ebbe, B.: Global distributional patterns of selected deep-sea Polychaeta  
917 (Annelida) from the Southern Ocean, Deep-Sea Res. II, 54, 1737–1751, 2007.  
918

919 Simpson, E. H.: Measurement of diversity, Nature, 163, 688, 1949.  
920

921 Smith, C. R., Kukert, H., Wheatcroft, R. A., Jumars, P. A. & Deming, J. W.: Vent fauna on  
922 whale remains, Nature, 341, 27–28, 1989.  
923

924 Smith, C. R. & A.W. J. Demopoulos.: Ecology of the deep Pacific Ocean floor. In:  
925 Ecosystems of the World Volume 28: Ecosystems of the Deep Ocean, P. A. Tyler,  
926 ed., Elsevier, Amsterdam, pp. 179–218, 2003.  
927

- 928 Smith, C. R., Drazen J. & Mincks, S. L.: Deep-sea Biodiversity and Biogeography:  
929 Perspectives from the Abyss. International Seabed Authority Seamount Biodiversity  
930 Symposium, 1–13, 2006.
- 931
- 932 Somero, G. N.: Adaptations to high hydrostatic pressure, *Ann. rev. physiol.*, 54, 57–577.  
933 1992.
- 934
- 935 Stuart, C., Rex, M. & Etter, R.: Large scale spatial and temporal patterns of deep-sea  
936 biodiversity. *Ecosystems of the World Volume 28: Ecosys. Deep Oc.*, P. A. Tyler, ed.,  
937 Elsevier, Amsterdam, 295–311, 2003.
- 938
- 939 Taguchi Y. H. & Oono, Y.: Relational patterns of gene expression via non-metric  
940 multidimensional scaling analysis, *Bioinformatics*, 21, 730–740, 2005.
- 941
- 942 Thiel, H.: Deep-sea Environmental Disturbance and Recovery Potential, *Int. Revue ges.*  
943 *Hydrobiol. Hydrogr.*, 77, 331–339, 1992. doi:10.1002/iroh.19920770213.
- 944
- 945 Thurston, M. H.: Abyssal necrophagous amphipods (Crustacea: Amphipoda) in the northeast  
946 and tropical Atlantic Ocean, *Prog. Oceanogr.*, 24, 257–274, 1990. doi:10.1016/0079-  
947 6611(90)90036-2.
- 948
- 949 Vader, W.: How many amphipods species? 6th International Crustacean Congress, Glasgow,  
950 Scotland, 18–22 July 2005, 143, 2005.
- 951
- 952 Wilson, G. D. F., Hessler R.: Speciation in the deep sea, *Ann. Rev. Ecol. Syst.*, 18, 185–207,  
953 1987.
- 954
- 955 Zardus, J. D., Etter, R. J., Chase, M. R., Rex, M. A. & Boyle, E. E. Bathymetric and  
956 geographic population structure in the pan-Atlantic deep-sea bivalve *Deminucula*  
957 *atacellana* (Schenck, 1939), *Mol. Ecol.*, 15, 639–651, 2006.
- 958
- 959

960 **Figure captions**

961

962 **Figure 1: Geographic locations of the two study areas, the Clarion-Clipperton**  
963 **fracture Zone (CCZ) (Northeast Pacific) and the DISTurbance and re-COLONisation**  
964 **(DisCOL) Experimental Area (DEA) (Peru Basin, Southeast Pacific).** There are nine  
965 Areas of Particular Ecological Interest (APEIs) in the CCZ region, which are illustrated  
966 by 400 x 400 km<sup>2</sup> white boxes. Grey boxes indicate the various contractor claim areas in  
967 the CCZ. We deployed eight amphipod traps across the CCZ, which is 16,000 km<sup>2</sup> and  
968 7000 km wide, and five in the DEA, which encompasses 11 km<sup>2</sup> with a width of 4 km.

969

970 **Figure 2: Histogram showing the species assemblage for the scavenging community**  
971 **in the Clarion-Clipperton fracture Zone (CCZ) (black) and the DisCOL**  
972 **Experimental Area (DEA) (grey).** The abundances of 19 morphotypes are shown.

973

974 **Figure 3: Catch Per Unit Effort (CPUE) illustrating the correlation between**  
975 **sampling time and number of individuals collected.** Only the > 15 mm fraction was  
976 included here to estimate number of collected individuals.

977

978 **Figure 4: Species rarefaction curves for each of the 13 trap stations across both**  
979 **areas, the Clarion-Clipperton fracture Zone and the DisCOL Experimental Area.**  
980 Only individuals longer than 15 mm were considered here.

981

982 **Figures 5a and b: Relative species abundances in the Clarion-Clipperton fracture**  
983 **Zone and the DisCOL Experimental Area.** These abundances represent the greater than  
984 15mm fraction of the scavenging amphipod community only.

985

986 **Figure 6: NMDS plot showing the beta biodiversity (dis/similarities) for each of the**  
987 **thirteen amphipod trap sampling stations associated with the two basins, Clarion-**  
988 **Clipperton fracture Zone (CCZ) (black) and the DisCOL Experimental Area (DEA) (red).**  
989 Data are supported by a low stress value of 0.01.

990

991

992 **Table captions**

993

994 **Table 1: Station overview.** Codes refer to the codes used in this paper in figures 1, 3, 4, 6  
995 and Table 3. The original station code represents the cruise codes from (SO239 and SO232-  
996 1). Depth refers to water depth (m) on deployment. Nodule presence/absence information is  
997 known only for stations D3 and D4.

998 **Table 2a:** Overview of morphotypes across the Clarion-Clipperton fracture Zone (CCZ) and  
999 DisCOL Experimental Area (DEA).

1000 **Table 2b:** Overview of morphotypes across the Clarion-Clipperton fracture Zone (CCZ) and  
1001 DisCOL Experimental Area (DEA).

1002 **Table 3:** Comparison of biodiversity calculated using the Simpson Index ( $D$ ), for the  
1003 Clarion-Clipperton fracture Zone and DisCOL Experimental Area, and  $D$  for each station is  
1004 shown for further comparisons within these areas.

1005  
1006  
1007  
1008

1009

1010

1011

1012

1013

1014

1015 **Appendix/Electronic Supplementary Information (ESM) captions**

1016

1017 **Appendix 1: Multibeam scan** - Showing the location of the 78 track marks created by the  
1018 plough harrow in the DisCOL Experimental Area to simulate manganese nodule extraction  
1019 activity (D1)

1020 **Appendix 2** – Photograph showing the baited free-fall lander trap designed and deployed by  
1021 RBINS.

1022 **Appendix 3** - Side-scan sonar image of site D5 showing possible seamount barriers. View  
1023 from NW (top) to SE (bottom). Contours are every 25 m. (Source: GEOMAR, 2015).

1024 **Appendix 4** – Calculation of alpha biodiversity used in this manuscript.

1025

1026

1027

1028

1029

1030

1031

1032

1033

1034

1035

1036

1037

1038

1039

1040

1041 **Appendix 1: Multibeam scan** - Showing the location of the 78 track marks created by the  
1042 plough harrow in the DisCOL Experimental Area to simulate manganese nodule extraction  
1043 activity.

1044

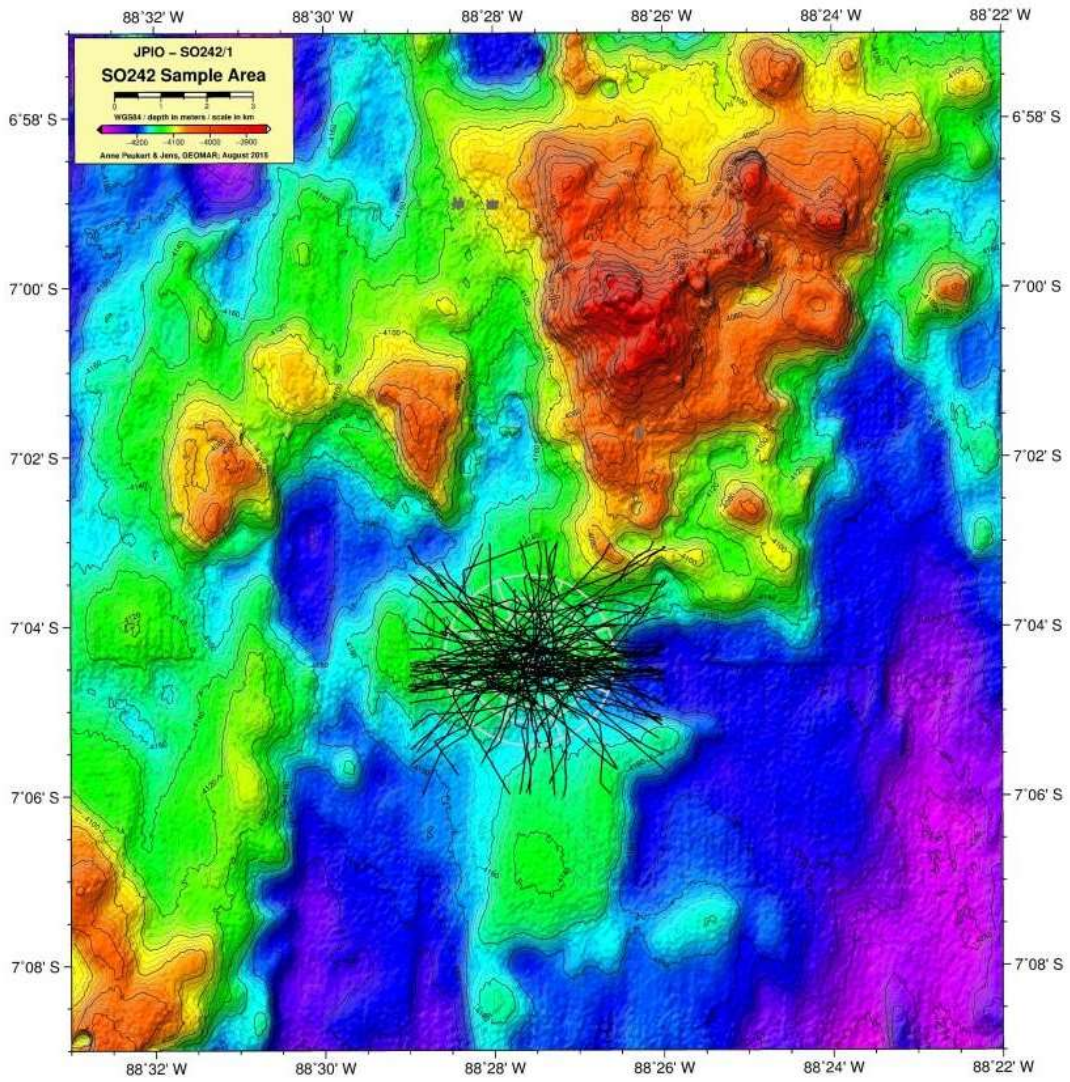

1045

1046

1047

1048

1049

1050

1051

1052



1053 **Appendix 2** – Photograph showing the baited free-fall lander trap designed and deployed by  
1054 RBINS.

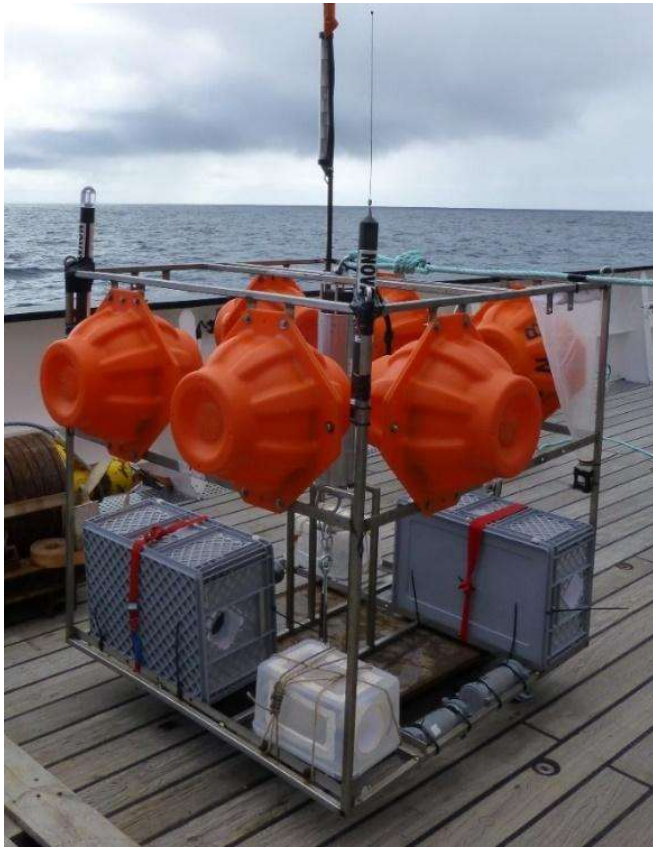

1055

1056

1057

1058

1059

1060

1061

1062

1063

1064

1065

1066

1067

1068 **Appendix 3** - Side-scan sonar image of site D5 showing possible seamount barriers. View  
1069 from NW (top) to SE (bottom). Contours are every 25 m. (Source: GEOMAR, 2015).

1070

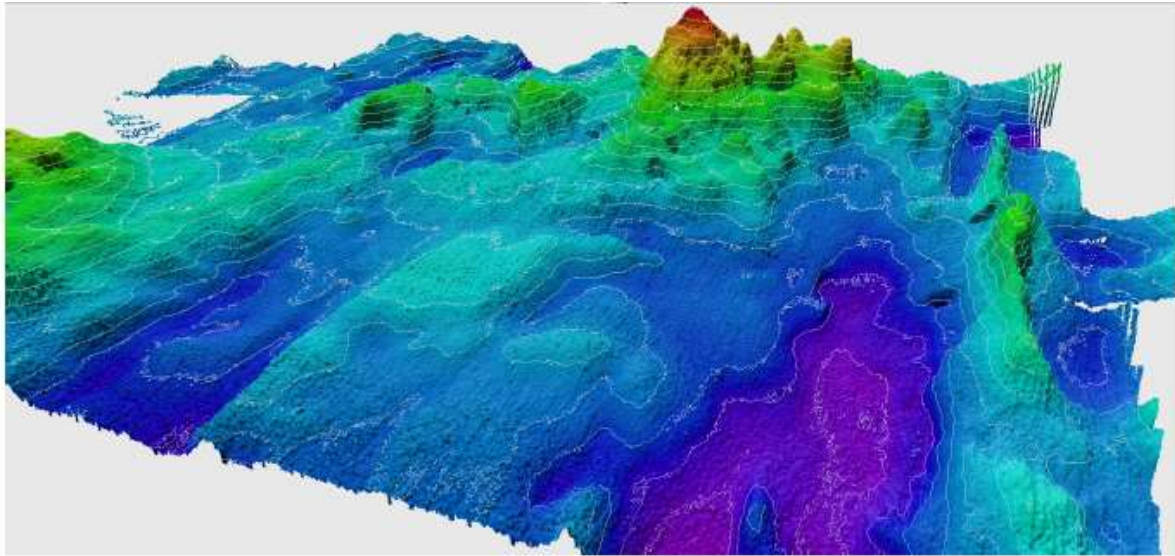

1071

1072

---

1073

1074

1075

1076

1077

1078

1079

1080

1081

1082 **Appendix 4** - Calculation of alpha biodiversity used in this manuscript.

1083 Simpson Index

1084 **Simpson Diversity Index (D) =  $1 - \frac{\sum n(n-1)}{N(N-1)}$  =**

1085 D = Diversity Index

1086 n = number of individuals in each particular species

1087 N = Total number in community

1088 A high value of D indicates a high species diversity.

1089
