# Supplementary material for: Biogeography and community structure of abyssal scavenging Amphipoda (Crustacea) in the Pacific Ocean
Source: Copernicus journal article supplement (doi:10.5194/bg-2018-347), 2018-08-07
Supplement: Supplementary file [file bg-2018-347-RC1-supplement.pdf]

1 **Biogeography and community structure of**  
2 **abyssal scavenging Amphipoda (Crustacea) in**  
3 **the Pacific Ocean.**

4  
5 Patel, Tasnim.<sup>1,2</sup>, Robert, Henri.<sup>1</sup>, D'Udekem D'Acoz, Cedric.<sup>3</sup>, Martens,  
6 Koen.<sup>1,2</sup>, De Mesel, Ilse.<sup>1</sup>, Degraer, Steven.<sup>1,2</sup> & Schön, Isa.<sup>1,4</sup>

7  
8 <sup>1</sup> *Royal Belgian Institute of Natural Sciences, Operational Directorate Natural Environment,*  
9 *Aquatic and Terrestrial Ecology, Vautierstraat 29, B-1000 Brussels, Gulledele 100, 1000*  
10 *Brussels and 3e en 23e linieregimentsplein, 8400 Oostende, Belgium.*

11 <sup>2</sup> *University of Ghent, Dept Biology, K.L. Ledeganckstraat 35, B-9000 Ghent, Belgium*

12 <sup>3</sup> *Royal Belgian Institute of Natural Sciences, Operational Directorate Taxonomy &*  
13 *Phylogeny, Vautierstraat 29, B-1000 Brussels, Belgium.*

14 <sup>4</sup> *University of Hasselt, Research Group Zoology, Agoralaan Building D, B-3590*  
15 *Diepenbeek, Belgium.*

16  
17 Corresponding author: [tpatel@naturalsciences.be](mailto:tpatel@naturalsciences.be)

27

28 **Abstract**

29

30 In 2015, we have collected more than 60,000 scavenging amphipod specimens during two  
31 expeditions to the Clarion-Clipperton fracture Zone (CCZ), in the Northeast (NE) Pacific and  
32 to the DISturbance and re-COLONisation (DisCOL) Experimental Area (DEA), a simulated  
33 mining impact disturbance proxy in the Peru basin, Southeast (SE) Pacific. Here, we compare  
34 biodiversity patterns of the larger specimens (> 15 mm) within and between these two  
35 oceanic basins. Nine scavenging amphipod species are shared between these two areas, thus  
36 indicating connectivity. We further provide evidence that disturbance proxies seem to  
37 negatively affect scavenging amphipod biodiversity, as illustrated by a reduced alpha  
38 biodiversity in the DEA (Simpson Index ( $D$ ) = 0.62), when compared to the CCZ ( $D$  = 0.73)  
39 and particularly of the disturbance site in the DEA and the site geographically closest to it.  
40 Community compositions of the two basins differs, as evidenced by a Non-Metric  
41 Dimensional Scaling (NMDS) analysis of beta biodiversity. The NMDS also shows a further  
42 separation of the disturbance site (D1) from its neighbouring, undisturbed reference areas  
43 (D2, D3, D4 and D5) in the DEA. A single species, *Abyssochomene gerulicorbis*, dominates  
44 the DEA with 60% of all individuals.

45 **Keywords**

46

47 JPIO Ecological Aspects of Deep-sea mining, Clarion Clipperton Fracture Zone, CCZ, DisCOL  
48 Experimental Area (DEA), Amphipoda.

49

50

51

52

53

54

55

56

57

58

## 59 **Introduction**

60

61 The deep sea (deeper than 3500m) represents the largest ecosystem on the planet, with the  
62 abyssal seafloor covering approximately 54% of the Earth's solid surface (Rex et al. 1993;  
63 Gage & Tyler, 1991). Since it is one of the least investigated ecosystems, there are still  
64 extensive gaps in our knowledge of deep-sea fauna (German et al. 2011). Marine research has  
65 thus far focused on coastal areas, hydrothermal vents or chemosynthetic habitats, whereas  
66 open-ocean abyssal plains have been less extensively investigated (Ramirez-Llodra et al.  
67 2010). This is unsurprising given the challenges of sampling this remote environment, which  
68 is impeded by several confounding factors. For example, deep-sea sampling is both  
69 financially expensive and labour intensive, and furthermore, constrained by the challenge of  
70 deploying equipment at low temperatures (0.01 - 4.0°C) and at high hydrostatic pressures  
71 (Sweetman et al. 2017). Therefore, to date very little of the deep sea has been sampled, and  
72 the oversampling in the North Atlantic basin has created a biased knowledge base (McClain  
73 & Hardy, 2010). Consequently, and owing to the low availability of data on deep-sea  
74 biodiversity, and with the inherent risk of under-sampling, it is difficult to estimate species  
75 richness in the deep sea.

76

77 In the traditional view of the deep sea, the abyss was considered to be homogeneous and  
78 many species were thought to have large biogeographical ranges, their dispersal aided by an  
79 apparent lack of barriers (Sanders, 1968). This hypothesis was challenged by the discovery of  
80 chemosynthetic habitats e.g. hydrothermal vents (Lonsdale, 1977), cold seeps (Paull et al.  
81 1984), seasonal fluctuations in primary productivity (Billett et al. 1983) and erratic whale-  
82 falls (Smith et al. 1989). All of this research has demonstrated that the deep sea is an  
83 extremely heterogeneous environment and is controlled by many factors, including:  
84 Particulate Organic Carbon (POC) flux, water depth, flow regime, current circulation,  
85 seafloor topography (Laver et al. 1985) and also historical factors e.g. the opening of ocean  
86 basins (i.e. rifting), sea-level rise and fall, and periods of deep-sea anoxia (Smith et al. 2006).  
87 All of these can result in a mosaic of different communities (Levin et al. 2001), many of  
88 which do not follow a latitudinal gradient (Brandt et al. 2007).

89

90 It has also been established that dispersal ability of species on the one hand, and their actual  
91 geographic and bathymetric distribution range on the other, are not always linked, and are  
92 often dependent on habitat suitability, **degree of fragmentation**, and ecological flexibility  
93 (Lester et al. 2007; Liow 2007). Therefore, although the deep-seafloor includes some of the  
94 largest contiguous features on the planet, the populations of many deep-sea species are  
95 spatially fragmented, and may become increasingly so with continued human disturbance  
96 (Hilario et al. 2015).

97

98 In the last decade, there has been an increased demand for exploitation of deep-sea resources  
99 e.g. fishing and hydrocarbon/rare earth element (REE) extraction (such as those concentrated  
100 in manganese nodule provinces) (Ramirez-Llodra et al. 2011). As a result, ecologists are  
101 increasingly asked to assess the ecological risks of these mining activities and to provide  
102 sustainable solutions for its mitigation, in order to prevent adverse changes to the deep-sea  
103 ecosystem (ISA, 2017).

104

105 Glover et al. (2001) showed that abyssal sediments can contain high biodiversity with more  
106 than 100 species of meiofaunal invertebrates (e.g. nematodes, copepods) and protists (e.g.  
107 foraminifers) found every square meter. In spite of this, our knowledge on the deep-sea  
108 ecosystem structure and functioning is still limited, and there is a paucity of data on the  
109 distribution, drivers and origins of deep-sea communities at global **scales, especially** on the  
110 biogeography of deep-sea Amphipoda (Barnard 1961; Thurston 1990) and other  
111 invertebrates. This lack of information on species richness and ecological uniqueness  
112 ultimately hampers the answering of crucial questions on recoverability and impedes  
113 ecologists from providing advice on sustainable deep-sea mining practices, thus,  
114 underpinning the need for this dedicated deep-sea ecosystem research.

115

116 Here, we present distribution patterns of scavenging deep-sea amphipod communities, with  
117 the first comparisons of their biogeography and community structures in two oceanic basins.  
118 We are investigating whether there are differences and similarities in the species  
119 compositions of the two basins (e.g. richness, abundances), and further exploit a disturbance  
120 experiment to compare the biodiversity of this mining impact proxy to the undisturbed  
121 reference areas. We discuss the possible implications of our findings; aiming to use them to

122 formulate recommendations regarding the pending deep-sea mining of manganese nodule  
123 activities in the NE Pacific ecosystem.

## 124 **Material and Methods**

125

### 126 *Study area*

127

128 We investigated the amphipod communities of two oceanic basins (Figure 1); (i) the Clarion-  
129 Clipperton Fracture Zone (CCZ, six million km<sup>2</sup>, 7000 km wide), an economically important  
130 manganese nodule field in the NE Pacific, comprising several different contractor claim  
131 areas, (who to date, have exploration licences only), and nine designated Areas of Particular  
132 Ecological Interest (APEIs) as designated by the International Seabed Authority (ISA)  
133 (Lodge et al, 2014) and (ii) the DISTurbance and re-COLONisation (DisCOL) Experimental  
134 Area (DEA, 11 km<sup>2</sup>, 4 km wide), a simulated mining disturbance proxy in the Peru Basin in  
135 the SE Pacific. In 1989, the DEA sediment bed was artificially disturbed using a plough-  
136 harrow to create 78 track marks. These are supposed to simulate the type of disruption which  
137 would be caused by a commercial mining operation (Appendix 1) (Thiel, 1992). This  
138 baseline study was a new approach in deep-sea risk assessment and is still ongoing today,  
139 providing us with crucial data from this long-term ecological experiment.

140

141

142

143

144

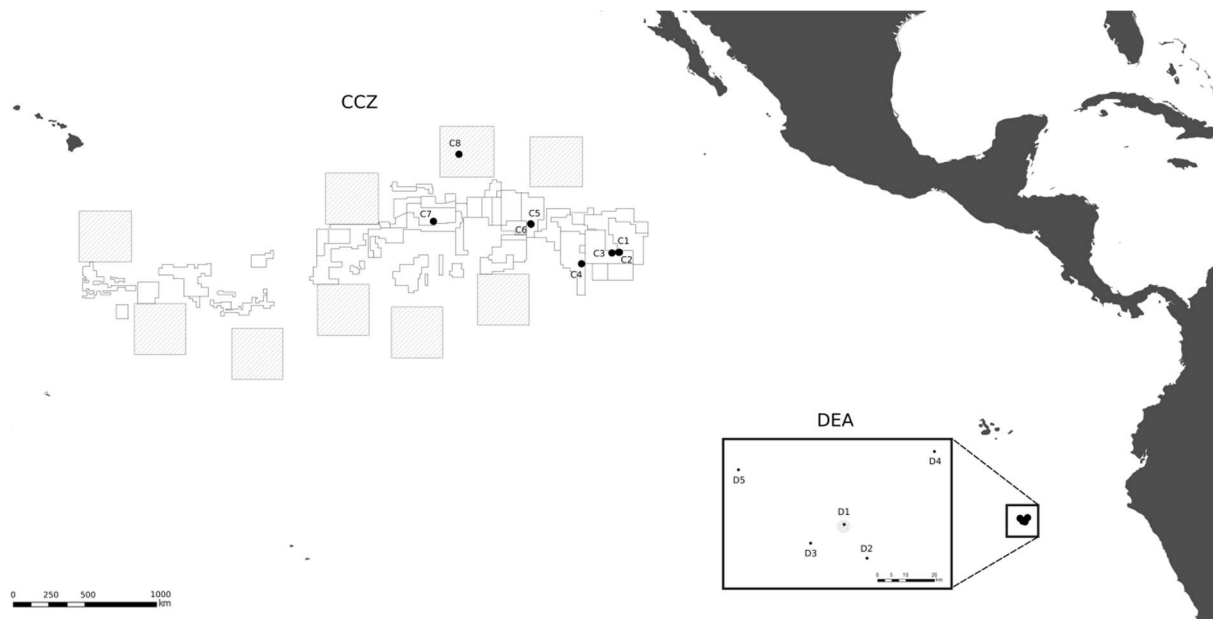

145

146 **Figure 1: Geographic locations of the two study areas, the Clarion-Clipperton fracture**  
 147 **Zone (CCZ) (Northeast Pacific) and the DISTurbance and re-COLonisation (DisCOL)**  
 148 **Experimental Area (DEA) (Peru Basin, Southeast Pacific).** There are nine Areas of  
 149 Particular Ecological Interest (APEIs) in the CCZ region, which are illustrated by 400 x 400  
 150 km<sup>2</sup> white boxes. Grey boxes indicate the various contractor claim areas in the CCZ. We  
 151 deployed eight amphipod traps across the CCZ, which is 16,000 km<sup>2</sup> and 7000 km wide, and  
 152 five in the DEA, which encompasses 11 km<sup>2</sup> with a width of 4 km.

153

### 154 *Sampling*

155

156 In 2015 (26 years after the first impact in the DEA in 1989), two research expeditions with  
 157 the “RV Sonne” visited the CCZ (cruise SO239), and revisited the DEA (cruise SO242-1 &  
 158 SO242-2), to assess if and how the deep-sea faunal communities had recovered within the  
 159 DEA, and to attempt to quantify their recolonization potential.

160

161 Amphipod samples were taken from the CCZ and DEA using a free-fall lander (120 x 120 x  
 162 120 cm), to which four plastic traps were attached (two 20 x 25 x 40 cm traps with four cm  
 163 openings and two 25 x 40 x 60 cm traps with eight cm openings), baited with an 800 g  
 164 mixture of mackerel and shrimp. Using this specially designed deep-sea sampling equipment,  
 165 more than 60,000 specimens of scavenging amphipods were collected from the CCZ and the  
 166 DEA sites.

167

168 The baited trap was deployed eight times across the CCZ at a depth range of 4116 - 4932 m  
 169 (samples C1 - C8), and five times in the DEA at a depth range of 4078 – 4307 m (samples D1

170 - D5; Figure 1, Table 1). In the CCZ, we sampled within three different contractor claim  
171 areas (Table 1) to obtain a pre-disturbance baseline, and to then compare it with one of the  
172 nine protected APEIs around the CCZ. In contrast, in the DEA, sampling was conducted once  
173 within the disturbed area (D1), twice 10 km away (D2, D3) and twice 40 km away (D4, D5)  
174 from D1 in four surrounding reference areas (see Figure 1).

175

176

177

178

179

180

181

182

183

184

185

186

187

188

189

190

191

192

193

194

195

196

197

198 **Table 1: Station overview.**

199 Codes refer to the codes used in this paper in figures 1, 3, 4, 6 and Table 3. The original  
 200 station code represents the cruise codes from (SO239 and SO232-1). Depth refers to water  
 201 depth (m) on deployment. Nodule presence/absence information is known only for stations  
 202 D3 and D4.

| Deployment Code | Original Station Code | Depth (m) | Known geological features                      | Remarks                                       |
|-----------------|-----------------------|-----------|------------------------------------------------|-----------------------------------------------|
| C1              | SO239-33              | 4122      | Plains                                         | German claim                                  |
| C2              | SO239-37              | 4116      | Plains                                         | German claim                                  |
| C3              | SO239-63              | 4354      | Plains                                         | German claim                                  |
| C4              | SO239-96              | 4388      | Seamount                                       | Inter Ocean Metals (IOM) claim                |
| C5              | SO239-123             | 4529      | Plains                                         | Belgian claim                                 |
| C6              | SO239-139             | 4516      | Plains<br>North/South<br>+ seamount<br>to west | Belgian claim                                 |
| C7              | SO239-173             | 4934      | Plains                                         | French claim                                  |
| C8              | SO239-205             | 4855      | Plains                                         | Area of Particular Ecological Interest (APEI) |
| D1              | SO242/1-8             | 4146      | Plains                                         | Disturbed                                     |
| D2              | SO242/1-30            | 4307      | Plains                                         | Undisturbed Reference                         |
| D3              | SO242/1-55            | 4043      | Seamount<br>No nodules                         | Undisturbed Reference                         |
| D4              | SO242/1-68            | 4078      | Seamount<br>No nodules                         | Undisturbed Reference                         |
| D5              | SO242/1-106           | 4269      | Plains                                         | Undisturbed Reference                         |

203  
 204  
 205  
 206



207 **Processing**

208

209 On recovery of the lander, all traps were disconnected and placed in pre-cooled (4°C) buckets  
210 of filtered seawater. All specimens were washed on board in a cool-climate laboratory (4°C),  
211 morphologically pre-sorted and fixed in molecular grade (95%) ethanol, before being stored  
212 at -20°C.

213

214 Detailed sorting and identification was performed using the morphological species concept  
215 (Futuyama, 1998) and the keys of Lowry & Killagen (2014) and Schulenberger & Barnard  
216 (1976), to separate the samples into taxonomic “morphotypes”. The larger fraction (> 15 mm  
217 length) has been identified to the lowest possible taxonomic resolution. Species not assigned  
218 with certainty are denoted here by as affiliated species (e.g. *genus* aff. *species*) or conferred  
219 species (e.g. *genus* cf. *species*).

220

221 Specimens with a size of less than 15 mm length were excluded from the analysis, primarily  
222 because these were mostly juveniles, and their morphological differences were not  
223 sufficiently pronounced to allow an accurate identification to the species or even genus level.  
224 Also, all pelagic amphipod specimens were omitted which were accidentally caught when the  
225 sampling equipment was retrieved to the sea surface. Genera containing multiple and as yet  
226 unidentified species have been summarised as “spp.”

227

228 **Statistical analyses**

229

230 Our null hypothesis ( $H_0$ ) here is that there are no differences in the amphipod biodiversity of  
231 the two basins. To test this hypothesis, we firstly calculated the alpha biodiversity ( $\alpha$ )  
232 between the two basins was using the Simpson Index ( $D$ ) (Simpson, 1949). Individual-based  
233 rarefaction curves were generated using the vegan package in R 2.3.0 (R Core Team, 2013;  
234 Gotelli, 2001) to compare species richness across all thirteen sampling stations and to test for  
235 the completeness of sampling.

236

237 Secondly, to compare the beta biodiversity, we estimated the variability of the community  
238 compositions per site. The Bray-Curtis dissimilarity metric (Bray & Curtis, 1957), was used  
239 to calculate differences between community compositions based on species densities, and the  
240 results were then visualised in 2D using a Non-Metric Dimensional Scaling (NMDS) plot.

241 The ANOSIM function in the vegan package of R (R Core Team, 2013; Taguchi & Ono,  
242 2005) was used to test the statistical significance of the differences in species compositions  
243 between the two study areas.

244

245

## 246 Results

247

### 248 *Basin biodiversity*

249

250 In total, 6916 scavenging amphipods (> 15 mm) were collected from the thirteen trap  
251 deployments in the two study areas, representing nineteen morphotypes (Figure 2). In the  
252 CCZ, we collected 3932 individuals, which represent ten morphotypes. Five of these have  
253 been identified to the species level: *Abyssorchomene distinctus*, *A. gerulicorbis*, *Eurythenes*  
254 *sigmiferus*, *Paralicella caperesca* and *Valettietta tenuipes*. A further two are affiliated to a  
255 species: *Paracallisoma* aff. *alberti* and *Valettietta* cf. *gracilis*, and the remaining three are at  
256 least affiliated to a genus (Tables 2a and 2b). The 2984 individuals from the DEA represent  
257 eighteen morphotypes. Six of these have been identified to the species level: *Abyssorchomene*  
258 *distinctus*, *A. gerulicorbis*, *Eurythenes sigmiferus*, *Paralicella caperesca*, *Parandaniexis*  
259 *mirabilis* and *Tectovallopsiis regelatus*. A further five which have been affiliated to a species:  
260 *Eurythenes* sp. 2. aff. *gryllus*, *Eurythenes* sp. 4. aff. *magellanicus*, *Paracallisoma* aff. *alberti*,  
261 *Stephonyx* sp. nov. aff. *arabiensis* and *Valettietta* cf. *gracilis* and the remaining seven  
262 identified to at least an affiliated genus (Tables 2a and 2b).

263

264 There are nine morphotypes shared between the basins: *Abyssorchomene distinctus*, *A.*  
265 *gerulicorbis*, *Abyssorchomene* spp., *Eurythenes sigmiferus*, *Eurythenes* spp. nov.,  
266 *Paracallisoma* aff. *alberti*, *Paralicella caperesca*, *Parandania* sp. and *Valettietta* cf. *gracilis*  
267 (Figure 2).

268

269 Two morphotypes were found only in the CCZ (*Hirondellea* sp. & *Valettietta tenuipes*), and  
270 eight morphotypes were found only in the DEA (*Eurythenes* sp. 1-4, gen. aff. *Cleonardo*,  
271 *Parandaniexis mirabilis*, *Stephonyx* sp. nov. aff. *arabiensis*, and *Tectovallopsiis regelatus*)  
272 (Table 2).

273

274

275

276

277

278

### Amphipod Trap Biodiversity in the CCZ & DEA

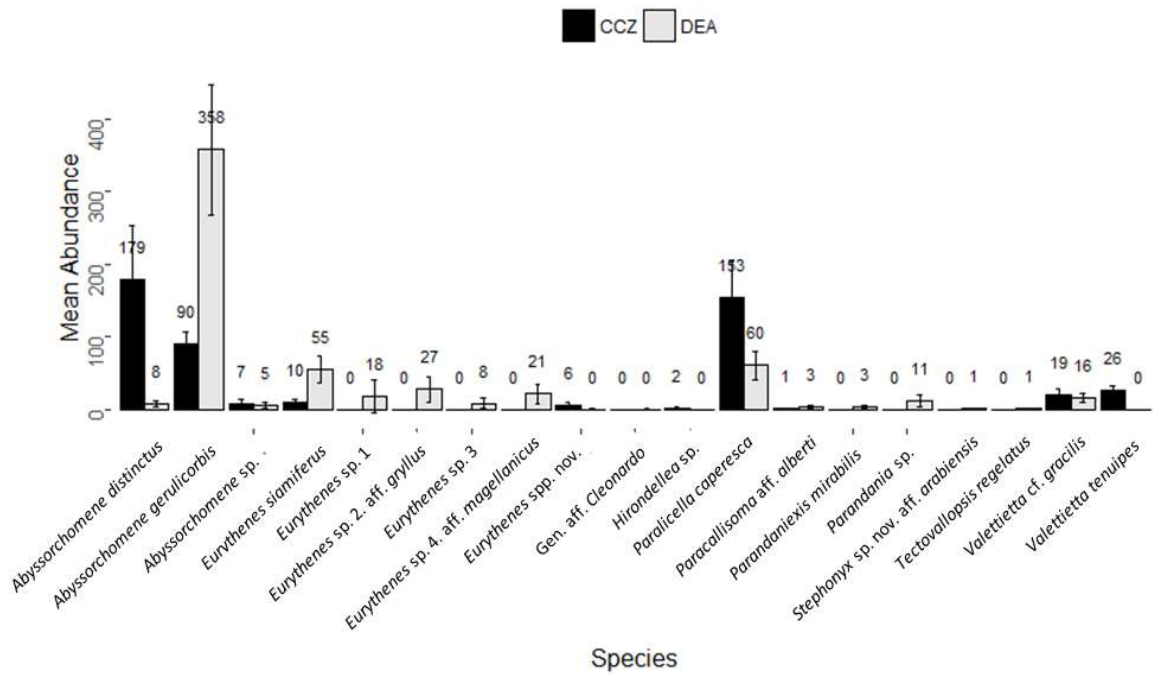

280

281

282 **Figure 2: Histogram showing the species assemblage for the scavenging community in**  
 283 **the Clarion-Clipperton fracture Zone (CCZ) (black) and the DisCOL Experimental**  
 284 **Area (DEA) (grey). The abundances of 19 morphotypes are shown.**

285

286

287

288

289

290

291

292

293

294

295

296

297

298

299 **Table 2a: Overview of morphospecies across the Clarion-Clipperton fracture Zone**  
 300 **(CCZ) and DisCOL Experimental Area (DEA).**

|                                       | Clarion-Clipperton fracture Zone              | DisCOL Experimental Area |
|---------------------------------------|-----------------------------------------------|--------------------------|
| Total unique morphotypes collected    | 19 (10 found in the CCZ, 18 found in the DEA) |                          |
| Species possibly unique to this basin | 2                                             | 8                        |
| Shared species between basins         | 9                                             |                          |

301  
302

303 **Table 2b: Distribution and abundances of morphospecies across the Clarion-Clipperton**  
 304 **fracture Zone (CCZ) and DisCOL Experimental Area (DEA).**

305

| Species                                   | C1  | C2  | C3  | C4  | C5  | C6 | C7  | C8  | D1  | D2  | D3  | D4  | D5  |
|-------------------------------------------|-----|-----|-----|-----|-----|----|-----|-----|-----|-----|-----|-----|-----|
| <i>Abyssorchomene distinctus</i>          | 629 | 312 | 180 | 170 | 64  | 47 | 2   | 25  | 9   | 3   | 25  | 0   | 5   |
| <i>Abyssorchomene gerulicorbis</i>        | 73  | 47  | 48  | 107 | 71  | 65 | 184 | 121 | 351 | 143 | 522 | 178 | 595 |
| <i>Abyssorchomene spp.</i>                | 0   | 0   | 50  | 0   | 0   | 3  | 0   | 0   | 5   | 20  | 0   | 0   | 0   |
| <i>Eurythenes sigmiferus</i>              | 9   | 3   | 35  | 11  | 12  | 5  | 0   | 6   | 30  | 61  | 127 | 36  | 22  |
| <i>Eurythenes sp. 1</i>                   |     |     |     |     |     |    |     |     | 0   | 90  | 0   | 0   | 1   |
| <i>Eurythenes sp. 2. aff. gryllus</i>     |     |     |     |     |     |    |     |     | 119 | 0   | 9   | 0   | 9   |
| <i>Eurythenes sp. 3</i>                   |     |     |     |     |     |    |     |     | 0   | 0   | 3   | 39  | 0   |
| <i>Eurythenes sp. 4 aff. magellanicus</i> |     |     |     |     |     |    |     |     | 0   | 0   | 59  | 0   | 47  |
| <i>Eurythenes.spp.nov.</i>                | 6   | 3   | 2   | 0   | 0   | 20 | 1   | 12  | 0   | 1   | 0   | 0   | 0   |
| gen. aff. <i>Cleonardo</i>                |     |     |     |     |     |    |     |     | 1   | 0   | 0   | 0   | 0   |
| <i>Hirondellea sp.</i>                    | 0   | 2   | 0   | 0   | 0   | 0  | 5   | 10  |     |     |     |     |     |
| <i>Paracallisoma aff. alberti</i>         | 0   | 0   | 0   | 0   | 0   | 2  | 1   | 6   | 10  | 4   | 0   | 1   | 1   |
| <i>Paralicella caperesca</i>              | 104 | 4   | 114 | 152 | 255 | 75 | 63  | 460 | 86  | 108 | 80  | 21  | 7   |
| <i>Parandania sp.</i>                     |     |     |     |     |     |    |     |     | 5   | 2   | 42  | 5   | 1   |
| <i>Parandaniexis mirabilis</i>            |     |     |     |     |     |    |     |     | 11  | 0   | 3   | 0   | 0   |
| <i>Stephonyx sp. nov. aff. arabiensis</i> |     |     |     |     |     |    |     |     | 0   | 4   | 0   | 0   | 0   |
| <i>Tectovallopsis regelatus</i>           |     |     |     |     |     |    |     |     | 5   | 0   | 0   | 0   | 0   |
| <i>Valettieta cf. gracilis</i>            | 75  | 11  | 29  | 3   | 2   | 5  | 1   | 23  | 2   | 29  | 17  | 1   | 29  |
| <i>Valettieta tenuipes</i>                | 22  | 0   | 14  | 42  | 43  | 9  | 19  | 58  |     |     |     |     |     |

306  
307  
308  
309  
310  
311  
312  
313  
314

315 **Sampling completeness**

316

317 Due to differences in allocated ship-times, the trap deployments were not identical, making it  
318 necessary to normalise deployment times. The resulting **Catch Per Unit Effort (CPUE)** plot  
319 (Figure 3,) shows that, with the exception of C5, all stations in the DEA yielded higher  
320 abundances/hr than the CCZ. The highest numbers of individuals/hr were collected at station  
321 D3. Overall, there is a moderate **correlation** with increasing deployment times ( $R = 0.67, p =$   
322  $0.01$ ).

323

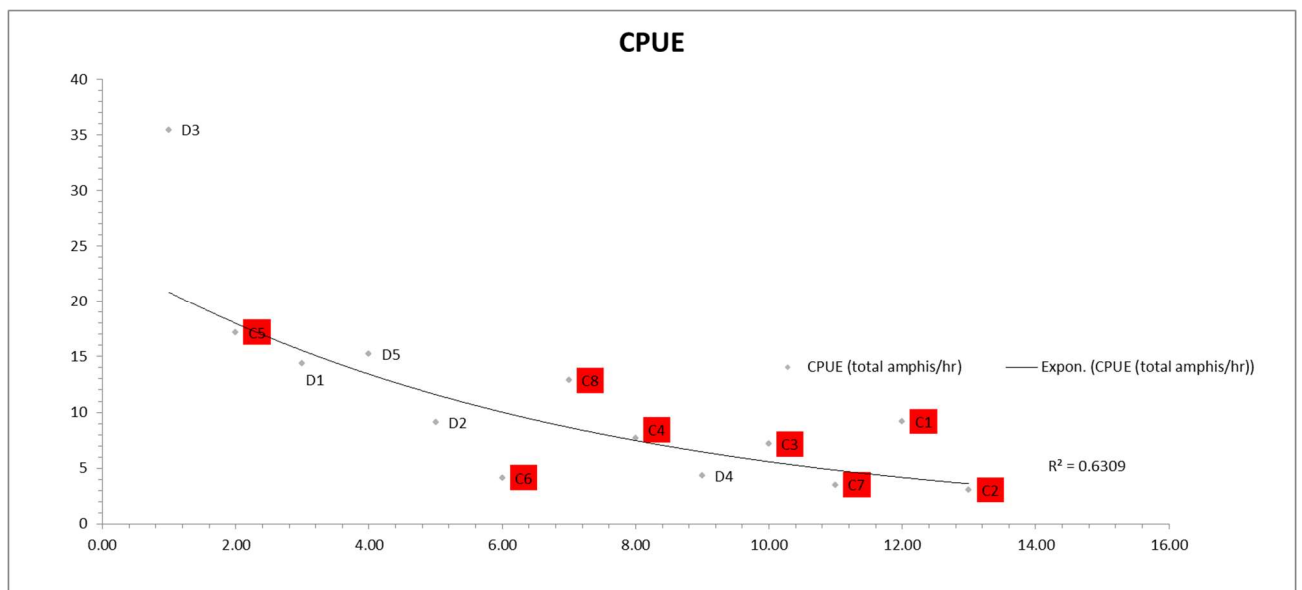

324

325 **Figure 3: Catch Per Unit Effort (CPUE) illustrating the correlation between sampling**  
326 **time and number of individuals collected.** Only the > 15mm fraction was included here to  
327 estimate number of collected individuals.

328

329

330

331

332

333

334

335

336

337

338 The rarefaction results (Figure 4) show that the curves for nine stations reach a plateau,  
339 indicating that sampling effort was sufficient to assess diversity levels. These include all CCZ  
340 stations except C7. In contrast, four of the five curves for the DEA (stations D1, D2, D4 and  
341 D5) are unsaturated.  
342

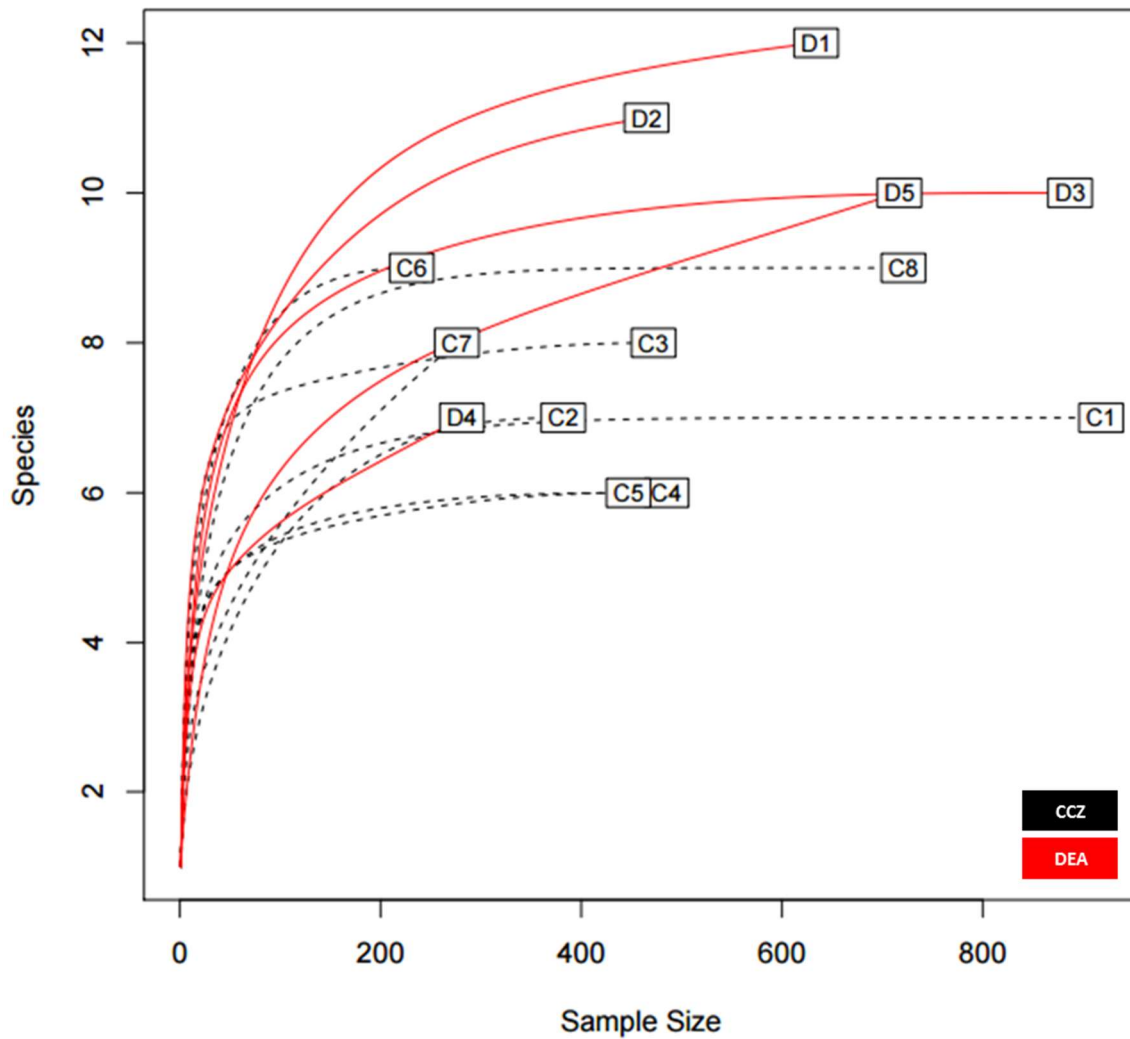

343  
344 **Figure 4: Species rarefaction curves for each of the 13 trap stations across both areas,**  
345 **the Clarion-Clipperton fracture Zone and the DisCOL Experimental Area. Only**  
346 **individuals greater than 15 mm were considered here.**

347  
348  
349  
350  
351

352 **Biodiversity**

353

354 Figures 5a and b show that the scavenging community in the CCZ is dominated by three  
355 species, *A. distinctus* (16%), *A. gerulicorbis* (18%) and *Paralicella caperesca* (31%),  
356 whereas, in contrast, the DEA scavenging community is dominated by a single species, *A.*  
357 *gerulicorbis*, accounting for almost 60% of all specimens. The Simpson Index ( $D$ ) for the  
358 entire CCZ area is (with 0.73), higher than the 0.616 that was calculated for the whole of the  
359 DEA area (Table 3). The biodiversity of each individual station was further explored (Table  
360 3). In the CCZ, the lowest biodiversity was found at C3 and C6 ( $D = 0.23$ ) and the highest at  
361 C2 ( $D = 0.67$ ), respectively. In the DEA, the lowest biodiversity of  $D = 0.36$  was found at  
362 station D1 (the site of the actual disturbance) and just south of the disturbance site at D2  
363 (0.21), while the highest biodiversity was observed at D5 ( $D = 0.61$ ) (Table 3).

364

365

366

367

368

369

370

371

372

373

374

375

376

377

378

379

380

381

382

383

384

385



# CCZ

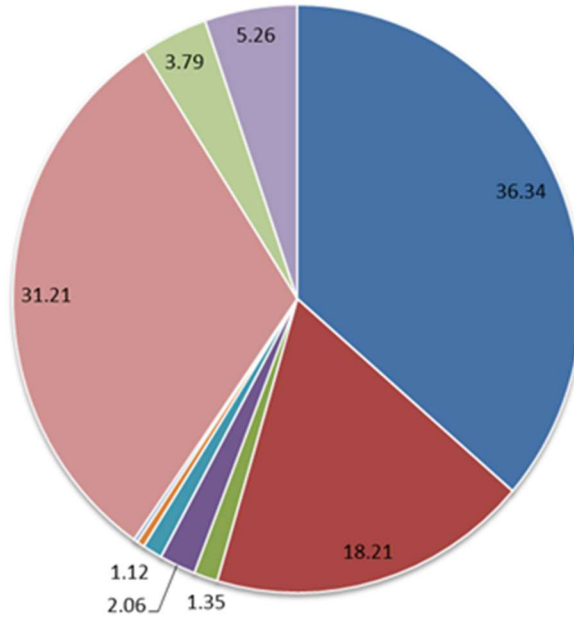

386

387

# DEA

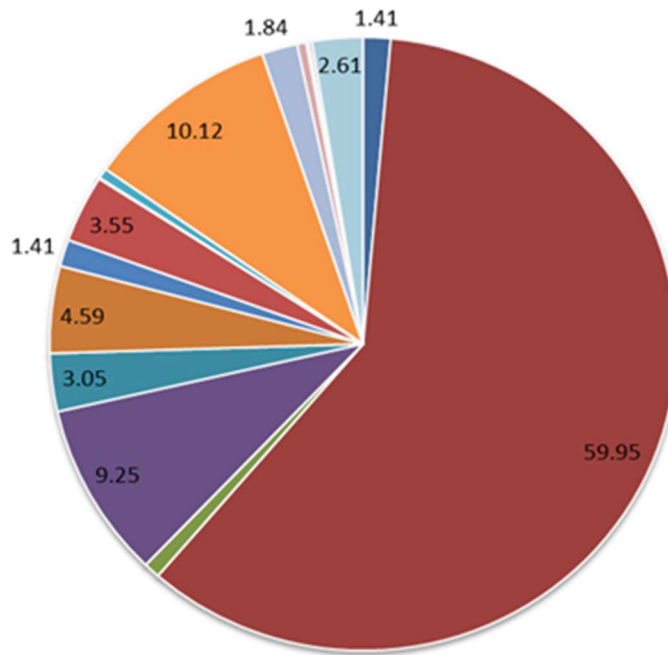

388

389

390

- *Abyssorchomene distinctus*
- *Abyssorchomene gerulicorbis*
- *Abyssorchomene* sp.
- *Eurythenes sigmiferus*
- *Eurythenes* sp. 1
- *Eurythenes* sp. 2 (aff. *gryllus*)
- *Eurythenes* sp. 3
- *Eurythenes* sp. 4 (aff. *magellanicus*)
- *Eurythenes* spp. nov.
- gen. aff. *Cleonardo*
- *Hirondellea* sp.
- *Paracallisoma* aff. *alberti*
- *Paralicella caperesca*
- *Parandania* sp.
- *Parandaniexis mirabilis*
- *Stephonyx* sp. nov. aff. *arabiensis*
- *Tectovallopsiopsis regelatus*
- *Valettietta gracilis*
- *Valettietta tenuipes*

391

392

393 **Figures 5a and b: Relative species abundances in the Clarion-Clipperton fracture Zone**

394 **and the DisCOL Experimental Area.** These abundances represent the greater than 15mm

395 fraction of the scavenging amphipod community only.

396

397

398

399

400

401

402

403

404

405

406

407

408 **Table 3: Comparison of biodiversity calculated using the Simpson Index (*D*), for the**  
 409 **Clarion-Clipperton fracture Zone and DisCOL Experimental Area, and *D* for each**  
 410 **station is shown for further comparisons within these areas.**

|                                                                   |      |
|-------------------------------------------------------------------|------|
| Simpson Index ( <i>D</i> ) whole Clarion-Clipperton Fracture Zone | 0.73 |
| Simpson Index ( <i>D</i> ) whole DisCOL Experimental Area         | 0.62 |
| C1 ( <i>D</i> )                                                   | 0.41 |
| C2 ( <i>D</i> )                                                   | 0.68 |
| C3 ( <i>D</i> )                                                   | 0.23 |
| C4 ( <i>D</i> )                                                   | 0.27 |
| C5 ( <i>D</i> )                                                   | 0.38 |
| C6 ( <i>D</i> )                                                   | 0.23 |
| C7 ( <i>D</i> )                                                   | 0.45 |
| C8 ( <i>D</i> )                                                   | 0.44 |
| D1 disturbed ( <i>D</i> )                                         | 0.36 |
| D2 ref 1 ( <i>D</i> )                                             | 0.21 |
| D3 ref 2 ( <i>D</i> )                                             | 0.38 |
| D4 ref 3 ( <i>D</i> )                                             | 0.44 |
| D5 ref 4 ( <i>D</i> )                                             | 0.61 |

411  
 412  
 413  
 414  
 415  
 416  
 417  
 418  
 419

420 *Species composition*

421

422 The NMDS shows that the communities of the two basins are clearly separated (ANOSIM:  $p$   
423 = 0.002); Figure 6). Within the CCZ, stations C1- C5 form one cluster, and stations C6, C7  
424 and C8 a second cluster. The disturbed area in the DEA (D1) is showing a clear difference to  
425 the four reference areas (D2 - 5). When the communities between the two basins are  
426 compared, D2 appears to be most similar to the CCZ community, and more specifically to  
427 C6, C7 and C8. The reliability of the data ranking is supported by a low stress value of 0.01.

428

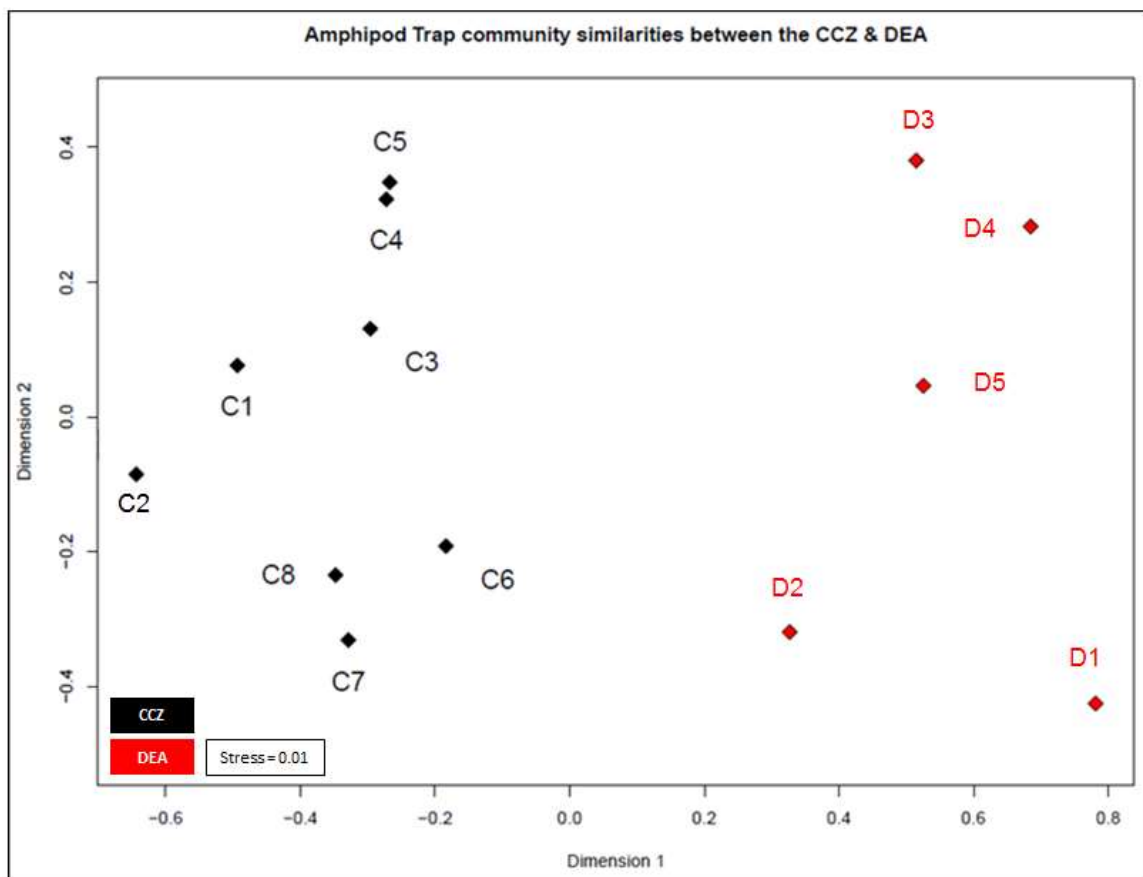

429

430 **Figure 6 :** NMDS plot showing the beta biodiversity (dis/similarities) for each of the thirteen  
431 amphipod trap sampling stations associated with the two basins, Clarion-Clipperton fracture  
432 Zone (CCZ) (black) and the DisCOL Experimental Area (DEA) (red). Data are supported by  
433 a low stress value of 0.01.

434

435

## 436 Discussion

437

### 438 *An unexplored ecosystem*

439 Although the most recent and comprehensive analysis of the Animal diversity of the World's  
440 oceans estimates a total of less than a million species over all depths (Appeltans et al. 2012),  
441 it is not currently known how many species actually inhabit the deep-sea. Regarding  
442 amphipods, only 328 benthic, demersal and benthopelagic species, belonging to 144 genera  
443 and 39 families, among a total of about 7000 marine amphipod species have been found  
444 below 2000 m. These numbers are reduced to 173 known species, 87 genera and 37 families  
445 at depths below 3000 m, and 100 known species, 66 genera and 31 families are known to  
446 occur below 4000 m (Vader 2005; Brandt et al, 2012).

447

### 448 *Lysianassoidea and their biogeography*

449

450 The superfamily Lysianassoidea constitutes an important part of the abyssal amphipod fauna.  
451 Also, in our sampling, lysianassoid amphipods were collected in large numbers (99% of the  
452 samples taken in both basins). As a superfamily, they comprise 23% of all the species found  
453 below 2000 m, 35% of the species found below 3000 m and 31% of the species found below  
454 4000 m (Brandt et al. 2012).

455

456 Many species in the Lysianassoidea occur in multiple abyssal basins, and some even have  
457 worldwide distributions (Thurston 1990). Despite the Ocean Biogeographic Information  
458 System (OBIS) database containing 615,650 records of Amphipoda, many of these are shelf  
459 or pelagic species, with very few records from the CCZ and DEA (OBIS, 2017). Here, we  
460 provide new data for the known bathymetric range of the twelve species we have identified  
461 (*Abyssorchomene distinctus*, *Abyssorchomene gerulicorbis*, *Eurythenes sigmiferus*,  
462 *Eurythenes* sp. 2. aff. *gryllus*, *Eurythenes* sp. 4. aff. *magellanicus*, *Paracallisoma* aff. *alberti*,  
463 *Paralicella caperesca*, *Parandaniexis mirabilis*, *Stephonyx* sp. nov. aff. *arabiensis*,  
464 *Tectovallopsiopsis regelatus*, *Valettieta* cf. *gracilis* & *Valettieta tenuipes*) (Table 2b). In  
465 addition, we have found multiple new species of *Eurythenes*, previously not known from  
466 these basins.

467 While we only sampled *Hirondellea* sp. and *Valettietta tenuipes* in the CCZ, and *Eurythenes*  
468 sp. 1- 4, gen. aff. *Cleonardo*, *Parandaniexis mirabilis*, *Stephonyx* sp. nov. aff. *arabiensis*, and  
469 *Tectovallopsis regelatus* only in the DEA, we cannot conclude based on the current data only  
470 if these species are unique to their respective basins without confirming these distribution  
471 patterns with additional sampling campaigns.

472

473

474

475

#### 476 **Catch Per Unit Effort**

477

478 Despite the sampling campaign in the CCZ being twice as long as the DEA, the number of  
479 individuals/species collected does not correlate positively with deployment effort. We assume  
480 that this is rather an effect of abiotic and organic factors, such as the productivity-driven  
481 gradients in the CCZ, which decrease from East-West and from North-South (Hannides &  
482 Smith, 2003). This lack of correlation is supported by our findings for station C2 (with the  
483 shortest deployment time), which shows the highest Simpson Index of all thirteen stations ( $D$   
484 = 0.67). Further evidence comes from the patterns visualised in Figure 3, which shows a  
485 correlation of  $R = 0.67$  for Catch Per Unit Effort (CPUE) and deployment times.

486

#### 487 **Biodiversity within basins**

488

489 Although the assemblage of the two basins has some overlap in its amphipod diversity (as is  
490 exemplified by the nine shared morphotypes), the sampling stations (and the two basins) are  
491 heterogeneous concerning species compositions of the subdominant and rarer species  
492 (Figures 5a & b). Thus, we can observe some negative influence (possibly attributed to the  
493 disturbance in the DEA) on the scavenging amphipod community. This reduced biodiversity  
494 is reflected in the higher Simpson Index ( $D$ ) for the CCZ (0.73) as compared to the DEA ( $D =$   
495 0.62; Table 3).

496

497 To explore whether this reduced diversity in the DEA was truly a result of the simulated  
498 disturbance,  $D$  was also calculated for each sampling station within each basin (Table 3).

499 In the CCZ, the APEI (C8) shows a moderate level of biodiversity ( $D = 0.44$ ), indicating that  
500 it is not optimally-placed for representing the biodiversity of the scavenging amphipod

501 community of the CCZ. Additionally, this pre-existing lower biodiversity (in comparison to  
502 the contractor claim areas), indicates that the APEI may not serve well as a refugium for  
503 amphipods post-disturbance. However, due to the fact that only one of the eight APEIs have  
504 been investigated thus far, this APEI along with the remaining eight APEIs would need to be  
505 (re-) sampled.

506

507 Within the DEA, the lowest biodiversities are observed at the site of the disturbance (D1) and  
508 south of it (D2; Table 3), indicating that the reduced biodiversity in the DEA could indeed be  
509 caused by the simulated disturbance in 1989 (Thiel, 1992).

510

511 The highest abundances in the DEA were collected from station D5 ( $n = 1242$ ); this station  
512 also has the highest Simpson Index within the DEA ( $D = 0.61$ ) (Table 3). Side-scan sonar  
513 imaging shows a seamount range to the North West (NW) of the disturbed area (D1)  
514 (Appendix 3). Although the relief change is only 150m, the range extends laterally for several  
515 kilometres (SO242-1 Cruise report, 2016) hampering dispersal across barriers such as sills  
516 and ridges (Smith, et al. 2006). Due to their mobile nature, the resulting geographic isolation  
517 alone cannot explain why such a high number of large scavenging individuals was collected  
518 at station D5.

519

### 520 *Community similarities*

521

522 Scavenging amphipods are resilient and dispersive, but most importantly, they are highly  
523 mobile (Ingram and Hessler 1983). Often driven by their search for erratic deposited feeding  
524 opportunities (Smith et al. 1989), they are probably less constrained by local environmental  
525 abiotic conditions and seafloor topography.

526

527 Beta diversity can be regarded as the dissimilarities in species composition between spatially  
528 different communities. As an indication for beta biodiversity, the NMDS (Figure 6) shows a  
529 significant separation in the similarity index between the two basins (ANOSIM  $p = 0.002$ ).

530 However, despite the dispersive and resilient nature of scavenging amphipods, their  
531 biodiversity appears to have been affected by the disturbance experiment as evidenced by the  
532 NMDS (Figure 6), where the disturbed area (D1) and the area closest to it (D2) are separated  
533 from the remaining three reference sites (D3, D4 and D5).

534

535 In the CCZ, stations C1, C2, C3, C4 and C5 form one cluster in the NMDS (Figure 6), and  
536 stations C6, C7 and C8 a second cluster. The CCZ is a geomorphologically very  
537 heterogeneous region, with seamounts of 200 m altitude running from north-south. A barrier  
538 of this height would be expected to affect sedimentation rates, nodule presence and currents.  
539 Furthermore, the difference in depth from the eastern edge (3950m) and the western edge  
540 (5150 m) is more than 1200 m. These combined factors very likely give rise to different  
541 trends in species composition (Glover, et al. 2015). However, at this stage, other biotic (e.g.  
542 the productivity gradient) and abiotic factors causing this separation cannot be excluded as  
543 alternative explanations.

544

### 545 *Dispersal and connectivity*

546

547 Whilst the NMDS (Figure 6) illustrates a visual separation of the two basins, there is also  
548 some similarity in the amphipod fauna between the two areas, (as is obvious by the nine  
549 shared species), indicating that dispersal for these nine species might range up to at least 3000  
550 km.

551

552 Station D2 is the closest station clustering with the CCZ community in terms of species  
553 composition (Figure 6), despite D5 being geographically closest to the CCZ. Abyssal  
554 amphipods have been shown to be able to travel actively at speeds of almost 4 cm/sec, even  
555 at temperatures as low as 3°C (Kankaanpää et al. 1995). It is obvious that they are  
556 sufficiently strong to swim up weak currents since they can be found several hundred meters  
557 above the seafloor searching pelagically for mates (e.g. *Eurythenes gryllus* occurring up to  
558 1800 m above the seafloor) (Thurston 1990;) or following food-falls (Baldwin and Smith  
559 1987).

560

561 Amphipods can also be carried over long distances by strong currents (Laver et al. 1985),  
562 which increases the probability of their passive dispersal (Conlan 1991; Highsmith, 1985).  
563 Except for the circumpolar current of the Southern Ocean, most of the abyssal seafloor seems  
564 to have low currents (Hollister & McCave, 1984). Still, even weak currents have been  
565 suggested as a mechanism for deep-sea faunal dispersal of amphipods (e.g. *Eurythenes*  
566 *gryllus* (Schüller and Ebbe 2007)). In the absence of comprehensive data on deep-sea  
567 currents, it is not yet possible to fully explain the drivers and mechanisms of amphipod  
568 dispersal between the CCZ and DEA.



569 *The DisCOL Experimental Area as a proxy*

570

571 Higher abundances of scavenging amphipods were collected from the CCZ (3932  
572 individuals) as opposed to the DEA (2984 individuals). Yet, we have identified more  
573 morphotypes in the DEA (18) than in the CCZ (10), indicating that the DEA is more  
574 speciose, and thus, more biodiverse.

575

576 Although the DEA is more speciose, many of its morphotypes were collected in low

577 abundances, with several of these being singletons or doubletons (collected from one or two  
578 sampling stations only).

This is reflected in the rarefaction curves (Figure 4), which indicate  
579 thorough sampling in the CCZ with all but station C7 reaching asymptotes. In contrast, four  
580 stations in the DEA (D1, D2, D4 and D5) are unsaturated, suggesting firstly that the less  
581 abundant species which are present at fewer stations only may not necessarily be rare species  
582 and secondly, that there could be as yet undetected biodiversity in the DEA. Therefore, the  
583 effects of mining impact could be even more pronounced than we observed in this study.

584 However, as the seafloor environment is subject to seasonal fluctuations (Billett et al. 1983),  
585 it is hard to predict exactly what the effects will be at this stage.

586

587 Our preliminary (basin-scale) comparison of the scavenging communities of the two study  
588 areas shows that even if the DEA is a small-scale disturbance experiment, it is a very diverse  
589 area. Thus, the DEA is a well-chosen site for monitoring the impacts of disturbance and  
590 instrumental in its role as a proxy to assess impending mining activities in the CCZ.

591

592

593 *Future research*

594

595 At several stations in both basins, we collected amphipods in very high abundances (C1, C8,  
596 D3 & D5) (Table 2b). Since biotic production is contingent on the sinking flux of particles  
597 from the euphotic zone (Sweetman, 2017), the biodiversity differences at each of the thirteen  
598 stations could be driven by Particulate Organic Carbon (POC) or erratic whale-falls (Smith et  
599 al. 1989). During future sampling campaigns, the POC of these areas should be monitored in  
600 addition to obtaining side-scan sonar and abiotic data.

601

602 It is not clear from our results whether substrate type (i.e. nodule/non-nodule) has any effect  
603 on the amphipod communities (Smith and Demopoulos, 2003) since this kind of data is only  
604 available for stations D3 and D4. To answer this question, resampling of the study areas in  
605 combination with an Ocean Floor Observation System (OFOBS) (video/camera) is required.  
606

607 Although our study only addresses the scavenging amphipod species longer than 15 mm, we  
608 already find indications for a disturbance effect in the DEA. It is obvious that scavenging  
609 amphipods are only one of several benthic indicator groups. Other benthic groups such as  
610 sponges or less dispersive amphipods (e.g. collected by epibenthic sledge (EBS)) may  
611 demonstrate an even more pronounced impact of mining activities and should be investigated  
612 in future studies.

613

614 With the application of molecular techniques to identify cryptic species (Delić et al, 2017),  
615 more realistic estimates of biodiversity can be obtained (Schön et al. 2012), improving our  
616 current knowledge of the biodiversity of this area. If these improved estimates of biodiversity  
617 also include cryptic species, it is possible that the biological impact of manganese nodule  
618 mining on amphipod and other deep-sea faunal communities may turn out to be even higher.

619

620

621

622

623

624

625

## 626 **Conclusions**

627

628 In summary, this study on the scavenging amphipod community of two abyssal oceanic  
629 basins has demonstrated that amphipods are present in high abundances across the CCZ and  
630 DEA, with nine shared species and some species possibly being unique to their respective  
631 basin.

632 Our results have indicated that the simulated mining experiment probably had an impact on  
633 the biodiversity of these scavenging amphipods, as demonstrated by the low *D* of the DEA  
634 overall, at the disturbance site itself (D1), and the 60% dominance of *A. gerulicorbis* in this  
635 region.

636 Given the scarcity of sampling and industry experience of marine habitats at these depths, the  
637 formulation of effective regulations is challenging (International Seabed Authority, 2017).  
638 Nonetheless, our study provides the first results on possible effects of disturbance activities  
639 on the abyssal amphipod biodiversity of deep-sea basins.

## 640 **Sample and data availability**

641 Biological samples pertaining to this manuscript are stored at the Royal Belgian Institute of Natural  
642 Sciences, and the data discussed in the manuscript are submitted to PANGEA.

## 643 **Acknowledgements**

644

645 The authors would like to acknowledge the Belgian Science and Policy Office (BELSPO) and the  
646 German Federal Ministry of Research and Education for funding. We would also like to thank the  
647 crew of the Research Vessel “Sonne”, the University of Ghent (Ghent, Belgium) and Zohra  
648 Elouaazizi (Brussels, Belgium) for help in the lab. This study would not have been possible without  
649 their support.

650

651

652 **References**

653

654 Appeltans, W., Boxshall, G., Bouchet, P., Vanhoorneb., Decock, W., Warren, A., Collinsa.,  
655 Kroh A., Schmidt–Rhaesa, A., Berta, A., Barber, A., Todaro, A., Gittenberger, A.,  
656 Hoeksema, B., Swalla, B., Neuhaus, B., Hayward, B., Self–Sullivan, C., Fransen, C.,  
657 Messing, C., Erséus, C., Emig, C., Boyko, C., Mah, C., Millsc., Nielsen, C., Jaume,  
658 D., Fautin, D., Domning, D. P., Gibson, D., Lazarus, D., Gordon, D., Opresko, D.,  
659 Schwabe, E., Mac–Pherson E., Thuesen, E., Dahdouh–Guebas, F., Anderson, G.,  
660 Poore, G., Williams, G., Walker–Smith, G., Read, G., Lambert, G., Paulay, G.,  
661 Segers, H., Furuya, H., Bartsch, I., Van Der Land, J., Reimer, J. D., Vanaverbeke, J.,  
662 Saiz–aiz, Saike, J., Sair, J. D., Pilger, J., Norenburg, J., Kolb, J., Schnabel, K. E.,  
663 Meland, K., Fauchald, K., Cheng, L., Van Ofwe–Gen L., Błażewicz–Paszkowycz,  
664 M., Rius, M., Curini–Galletti, M., Schotte, M., Tasker, M. L., Angel, M. V., Osawa,  
665 M., Longshaw M., Guiry, M., Bailly, N., De Voogd, N., Bruce N., Shenkar, N.,  
666 Garcia–Alvarez, O., Mclaughlin, P., Kirk, P., Davie, P., Ng, P. K. L., Schuchert P.,  
667 Uetz P., Bock P., Pugh P., Lemaitrer., Kristensen R., Van Soestr., Bray, R., Bamber,  
668 R. N., Da Rocha, R. M., Hopcroft R., Stöhr, S., De Grave, S., Gerken, S., Gofas, S.,  
669 Tyler, S., Ahyong, S., Wilson, S., Brandao S. N., Koenemann, S., Feist, S., Cairns, S.,  
670 Timm, T., Cribb, T., Molodtsova, T., Chan, T.–Y., Iseto, T., Artois, T., Scarabino, V.,  
671 Siegel, V., Eschmeyer, W., Hummon, W., Perrin W., Sterrer, W., Hernandez, F.,  
672 Mees J., Costello, M. J.: The Magnitude of Global Marine Biodiversity, *Curr. Biol.*,  
673 22, 2189–2202, 2012.

674

675 Baldwin, R. J. & Smith, K. L. Jr.: Temporal variation in the catch rate, length, color, and sex  
676 of the necrophagus amphipod, *Eurythenes gryllus*, from the central and eastern North  
677 Pacific, *Deep Sea Res. (part 1 Oceanogr. Res. Pap.)*, 34, 425–439, 1987.

678

679 Barnard, J. L.: Gammaridean Amphipoda from depth of 400 to 6000 m, *Galathea. Rep.*, 5,  
680 23–128, 1961.

681

682 Barnard, J. L. & Karaman, G.: The Families and Genera of Marine Gammaridean Amphipoda  
683 (Except Marine Gammaroids), *Rec. Aust. Mus. Suppl.* 13., 1–866, 1991.

684

685 Belyaev, G. M.: Deep-Sea Ocean Trenches and Their Fauna. Nauka Publishing House,  
686 Moscow, 385 pp, 1989.  
687

688 Billett, D. S. M., Lampitt, R. S., Rice, A. L. & Mantoura, R. F. C.: Seasonal sedimentation of  
689 phytoplankton to the deep-sea benthos, *Nature*, 302, 520–522. 1983.  
690

691 Blankenship, L. E. & Levin, L. A.: Extreme food webs: Foraging strategies and diets of  
692 scavenging amphipods from the ocean's deepest 5 kilometers, *Limnol. Oceanogr.*, 52,  
693 1685–1697, 2007.  
694

695 Brandt, A., Gooday A. J., Brix S. B., Brökeland, W., Cedhagen, T., Choudhury, M.,  
696 Cornelius, N., Danis, B., De Mesel, I., Diaz R. J., Gillan D. C., Ebbe B., Howe J.,  
697 Janussen, D., Kaiser, S., Linse, K., Malyutina, M., Brandao, S., Pawlowski, J. &  
698 Raupach, M.: The So Deep Sea: First Insights Into Biodiversity And Biogeography.  
699 *Nature*, 447, 307–311, 2007.  
700

701 Bray, J. R. & J. T. Curtis.: An ordination of upland forest communities of southern  
702 Wisconsin, *Ecol. Mono.*, 27, 325–349, 1957.  
703

704 Brenke, N.: An epibenthic sledge for operations on marine soft bottom and bedrock, *Mar.*  
705 *Technol. Soc. J.*, 39, 10–21, 2005. [hdl.handle.net/10.4031/002533205787444015](http://hdl.handle.net/10.4031/002533205787444015).  
706

707 Carmona, L., Malaquias, M. A. E., Gosliner, T. M., Pola, M. & Cervera, J. L. Amphi-Atlantic  
708 distributions and cryptic species in Sacoglossan sea slugs, *J. Molluscan Stud.*, 77,  
709 401–412, 2011.  
710

711 Conlan K. E.: Precopulatory mating behavior and sexual dimorphism in the amphipod  
712 *Crustacea*, *Hydrobiologia*, 223, 255–282, 1991.  
713

714 Delić, T., Trontelj, P., Rendoš, M. & Fišer., C.: The importance of naming cryptic species  
715 and the conservation of endemic subterranean amphipods. *Sci. Rep.*, 7, 3391, 2017.  
716 <https://doi.org/10.1038/s41598-017-02938-z>  
717

718 France, D. & Kocher, T.: Geographic and bathymetric patterns of mitochondrial 16S rRNA  
719 sequence divergence among deep-sea amphipods, *Eurythenes gryllus*. Mar. Biol., 126,  
720 633–643, 1996.

721

722 Futuyma, D. J.: Evolutionary Biology, ed. 3. Sinauer Associates, Sunderland MA, 751 pp.,  
723 1998.

724

725 Gage, J. D. & Tyler, P. A.: Deep-Sea Biology: a natural history of organisms at the deep-sea  
726 floor, Vol. Cambridge University press, Cambridge, 1991.

727

728 German C. R., Ramirez-Llodra, E., Baker, M. C., Tyler, P. A., and the Chess Scientific  
729 Steering Committee.: Deep-Water Chemosynthetic Ecosystem Research during the  
730 Census of Marine Life Decade and Beyond: A Proposed Deep Ocean Road Map,  
731 PLoS ONE, 6, 2011. doi:10.1371/journal.pone.0023259.

732

733 Glover, A., Paterson, G., Bett, B., Gage, J., Sibuet, M., Sheader, M., Hawkins, L.: Patterns in  
734 polychaete abundance and diversity from the Madeira Abyssal Plain, northeast  
735 Atlantic. Deep Sea Res. (part 1 Oceanogr. Res. Pap.), 48, 217–236, 2001.

736

737 Glover, A., Smith, C. R., Paterson, G. J. L., Wilson, G. D. F., Hawkins, L. & Sheader, M.:  
738 Polychaete species diversity in the central Pacific abyss: local and regional patterns,  
739 and relationships with productivity, Mar. Ecol. Prog. Ser., 240, 157–170, 2002.

740

741 Gotelli, N. J. & Colwell, R., K.: Quantifying Biodiversity: Procedures and Pitfalls in the  
742 Measurement and Comparison of Species Richness.”, Ecol. Lett., 4, 379–91, 2001.  
743 doi:10.1046/j.1461-0248.2001.00230.

744

745 Hannides, A., Smith, C. R.: The northeast abyssal Pacific plain. In: Biogeochemistry of  
746 Marine Systems, K. B. Black and G. B Shimmiel, eds., CRC Press, Boca Raton,  
747 Florida, 208-237, 2003.

748

749 Havermans, C., Sonet, G., d'Udekem d'Acoz, C., Nagy, Z. T., Martin, P., Brix, S., Riehl, T.,  
750 Agrawal, S. & Held, C.: Genetic and morphological divergences in the cosmopolitan

751 deep-sea amphipod *Eurythenes gryllus* reveal a diverse abyss and a bipolar species.  
752 PLoS ONE, 8, e74218, 2013.

753

754 Held, C. & Wägele, J. W.: Cryptic speciation in the giant Antarctic isopod *Glyptonotus*  
755 *antarcticus* (Isopoda: Valvirfera: Chaetiliidae), *Sci. Mar.* 69 (Suppl. 2), 175–181,  
756 2005.

757

758 Highsmith, R.: Floating and algal rafting as potential dispersal mechanisms in brooding  
759 invertebrates, *Mar. Ecol. Prog. Ser.*, 25, 169–179, 1985.

760

761 Hilário, A., Metaxas, A., Gaudron, S. M., Howell, K. L., Mercier, A., Mestre, N. C., Ross, R.  
762 E., Thurnherr, A. M. & Young, C.: Estimating dispersal distance in the deep  
763 sea: challenges and applications to marine reserves, *Front. Mar. Sci.*, 2, 2015.  
764 doi:10.3389/ fmars.2015.00006.

765

766 International Seabed Authority. A Discussion Paper on Developing a Regulatory Framework  
767 for Mineral Exploitation in the Area (Env. Matt.), 1–102, 2017.

768

769 Kankaanpää, H., Laurén, M., Mattson, M. & Lindström, M.: Effects of bleached kraft mill  
770 effluents on the swimming activity of *Monoporeia affinis* (Crustacea, Amphipoda)  
771 lindström, *Chemosphere*, 31, 4455–4473, 1995.

772

773 Laver, M. B., Olsson, M. S., Edelman, J. L. & Smith K. L. Jr.: Swimming rates of scavenging  
774 deep-sea amphipods recorded with a free-vehicle video camera. *Deep-Sea Res. II*,  
775 32, 1135–1142, 1985.

776

777 Lester, S. E., Ruttenberg, B. I., Gaines, S. D. & Kinlan B. P.: The relationship between  
778 dispersal ability and geographic range size. *Ecol. Lett.*, 10, 745–758, 2007.

779

780 Levin, L. A., Etter, R.J., Rex, M. A., Gooday, A. J., Smith, C. R., Pineda, J., Stuart, C. T.,  
781 Hessler, R. R. & Pawson, D.: Environmental influences on regional deep-sea species  
782 diversity, *Annu. Rev. Ecol. Evol. Syst.*, 32, 51–93, 2001.

783

784 Liow, L. H.: Does versatility as measured by geographic range, bathymetric range and  
785 morphological variability contribute to taxon longevity?, *Glob. Ecol. Bio.*, 16, 117–  
786 128, 2007.

787

788 Lodge, M., Johnson, D., Le Gurun, G., Wengler, M., Weaver, P. & Gunn, V.: Seabed mining:  
789 International Seabed Authority environmental management plan for the Clarion–  
790 Clipperton Zone. A partnership approach, *Mar. Pol.*, 49, 66–72, 2014.

791

792 Lonsdale, P.: Clustering of suspension-feeding macrobenthos near abyssal hydrothermal  
793 vents at oceanic spreading centers, *Deep-Sea Res.*, 24, 857–863, 1977.

794

795 Managing Impacts of Deep Sea Resource Exploitation (MIDAS) Summary Report:  
796 Biodiversity in the Clarion-Clipperton Zone, 1–2, 2016.

797

798 McClain, C. R. & Hardy, S. M.: The dynamics of biogeographic ranges in the deep sea, *Proc.*  
799 *Roy. Soc. B: Bio. Sci.*, 277, 3533–3546, 2010.

800

801 Paull, C. K., Hecker, B., Commeau, R., Freeman-Lynde, R. P., Neumann, C., Corso, W. P.,  
802 Golubic, S., Hook, J. E., Sikes, E. & Curray, J.: Biological communities at the Florida  
803 escarpment resemble hydrothermal vent taxa, *Science*, 226, 965–967, 1984.

804

805 R Core Team. R: A language and environment for statistical computing. R Foundation for  
806 Statistical Computing, Vienna, Austria. ISBN 3-900051-07-0, 2013.

807 URL <http://www.R-project.org/>.

808

809 Ramirez-Llodra, E., Brandt, A., Danovaro, R., De Mol, B., Escobar, E., German, C. R.,  
810 Levin, L. A., Martinez Arbizu, P., Menot, L., Buhl-Mortensen, P., Narayanaswamy,  
811 B. E., Smith, C. R., Tittensor, D. P., Tyler, P. A., Vanreusel, A. & Vecchione, M.:  
812 Deep, diverse and definitely different: unique attributes of the world's largest  
813 ecosystem, *Biogeosciences*, 7, 2851–2899, 2010.

814

815 Ramirez-Llodra, E., Tyler, P. A., Baker, M. C., Bergstad, O. A., Clark, M. R. & Escobar, E.:  
816 Man and the last great wilderness: human impact on the Deep Sea, *PLoS ONE*, 6,  
817 2011. doi:10.1371/journal.pone.0022588.



818  
819 Rex, M. A., Stuart, C. T., Hessler, R., R., Allen, J. A., Sanders, H. L. & Wilson, G. D. F.:  
820 Global-scale latitudinal patterns of species diversity in the deep-sea benthos, *Nature*,  
821 365, 636–639, 1993.  
822  
823 Sanders H. L.: Marine benthic diversity: a comparative study, *Am. Nat.*, 102, 243–282, 1968.  
824  
825 Schön I, Pinto R. L., Halse, S., Smith, A. J. & Martens, K.: Cryptic Species in Putative  
826 Ancient Asexual Darwinulids (Crustacea, Ostracoda), *PLoS ONE*, 7, e39844.  
827 doi:10.1371/journal.pone.0039844. 2012.  
828  
829 Schulenberger, E. & Barnard, J. L.: Clarification of the Abyssal Amphipod, *Paralicella*  
830 *tenuipes* Chevreux, *Crustaceana*, 31, 267–274, 1976.  
831  
832 Schüller, M. & Ebbe, B.: Global distributional patterns of selected deep-sea Polychaeta  
833 (Annelida) from the Southern Ocean, *Deep-Sea Res. II*, 54, 1737–1751, 2007.  
834  
835 Simpson, E. H.: Measurement of diversity, *Nature*, 163, 688, 1949.  
836  
837 Smith, C. R., Kukert, H., Wheatcroft, R. A., Jumars, P. A. & Deming, J. W.: Vent fauna on  
838 whale remains, *Nature*, 341, 27–28, 1989.  
839  
840 Smith, C. R. & A.W. J. Demopoulos.: Ecology of the deep Pacific Ocean floor. In:  
841 Ecosystems of the World Volume 28: Ecosystems of the Deep Ocean, P. A. Tyler,  
842 ed., Elsevier, Amsterdam, pp. 179–218, 2003.  
843  
844 Smith, C. R., Drazen J. & Mincks, S. L.: Deep-sea Biodiversity and Biogeography:  
845 Perspectives from the Abyss. International Seabed Authority Seamount Biodiversity  
846 Symposium, 1–13, 2006.  
847  
848 Somero, G. N.: Adaptations to high hydrostatic pressure, *Ann. rev. physiol.*, 54, 57–577.  
849 1992.  
850

851 Stuart, C., Rex, M. & Etter, R.: Large scale spatial and temporal patterns of deep-sea  
852 biodiversity. Ecosystems of the World Volume 28: Ecosys. Deep Oc., P. A. Tyler, ed.,  
853 Elsevier, Amsterdam, 295–311, 2003.

854

855 Taguchi Y. H. & Oono, Y.: Relational patterns of gene expression via non-metric  
856 multidimensional scaling analysis, *Bioinformatics*, 21, 730–740, 2005.

857

858 Thiel, H.: Deep-sea Environmental Disturbance and Recovery Potential, *Int. Revue ges.*  
859 *Hydrobiol. Hydrogr.*, 77, 331–339, 1992. doi:10.1002/iroh.19920770213.

860

861 Thurston, M. H.: Abyssal necrophagous amphipods (Crustacea: Amphipoda) in the northeast  
862 and tropical Atlantic Ocean, *Prog. Oceanogr.*, 24, 257–274, 1990. doi:10.1016/0079-  
863 6611(90)90036-2.

864

865 Vader, W.: How many amphipods species? 6th International Crustacean Congress, Glasgow,  
866 Scotland, 18–22 July 2005, 143, 2005.

867

868 Wilson, G. D. F., Hessler R.: Speciation in the deep sea, *Ann. Rev. Ecol. Syst.*, 18, 185–207,  
869 1987.

870

871 Zardus, J. D., Etter, R. J., Chase, M. R., Rex, M. A. & Boyle, E. E. Bathymetric and  
872 geographic population structure in the pan-Atlantic deep-sea bivalve *Deminucula*  
873 *atacellana* (Schenck, 1939), *Mol. Ecol.*, 15, 639–651, 2006.

874

875

876

877

878

879

880

881 **Figure captions**

882

883 **Figure 1: Geographic locations of the two study areas, the Clarion-Clipperton**  
884 **fracture Zone (CCZ) (Northeast Pacific) and the DISTurbance and re-COLonisation**  
885 **(DisCOL) Experimental Area (DEA) (Peru Basin, Southeast Pacific).** There are nine  
886 Areas of Particular Ecological Interest (APEIs) in the CCZ region, which are illustrated  
887 by 400 x 400 km<sup>2</sup> white boxes. Grey boxes indicate the various contractor claim areas in  
888 the CCZ. We deployed eight amphipod traps across the CCZ, which is 16,000 km<sup>2</sup> and  
889 7000 km wide, and five in the DEA, which encompasses 11 km<sup>2</sup> with a width of 4 km.

890

891 **Figure 2: Histogram showing the species assemblage for the scavenging community**  
892 **in the Clarion-Clipperton fracture Zone (CCZ) (black) and the DisCOL**  
893 **Experimental Area (DEA) (grey).** The abundances of 19 morphotypes are shown.

894

895 **Figure 3: Catch Per Unit Effort (CPUE) illustrating the correlation between**  
896 **sampling time and number of individuals collected.** Only the > 15 mm fraction was  
897 included here to estimate number of collected individuals.

898

899 **Figure 4: Species rarefaction curves for each of the 13 trap stations across both**  
900 **areas, the Clarion-Clipperton fracture Zone and the DisCOL Experimental Area.**  
901 Only individuals longer than 15 mm were considered here.

902

903 **Figures 5a and b: Relative species abundances in the Clarion-Clipperton fracture**  
904 **Zone and the DisCOL Experimental Area.** These abundances represent the greater than  
905 15mm fraction of the scavenging amphipod community only.

906

907 **Figure 6: NMDS plot showing the beta biodiversity (dis/similarities) for each of the**  
908 **thirteen amphipod trap sampling stations associated with the two basins, Clarion-**  
909 **Clipperton fracture Zone (CCZ) (black) and the DisCOL Experimental Area (DEA) (red).**  
910 Data are supported by a low stress value of 0.01.

911

912

913 **Table captions**

914

915 **Table 1: Station overview.** Codes refer to the codes used in this paper in figures 1, 3, 4, 6  
916 and Table 3. The original station code represents the cruise codes from (SO239 and SO232-  
917 1). Depth refers to water depth (m) on deployment. Nodule presence/absence information is  
918 known only for stations D3 and D4.

919 **Table 2a:** Overview of morphospecies across the Clarion-Clipperton fracture Zone (CCZ)  
920 and DisCOL Experimental Area (DEA).

921 **Table 2b:** Overview of morphospecies across the Clarion-Clipperton fracture Zone (CCZ)  
922 and DisCOL Experimental Area (DEA).

923 **Table 3:** Comparison of biodiversity calculated using the Simpson Index ( $D$ ), for the  
924 Clarion-Clipperton fracture Zone and DisCOL Experimental Area, and  $D$  for each station is  
925 shown for further comparisons within these areas.

926 **Appendix/Electronic Supplementary Information (ESM) captions**

927

928 **Appendix 1: Multibeam scan** - Showing the location of the 78 track marks created by the  
929 plough harrow in the DisCOL Experimental Area to simulate manganese nodule extraction  
930 activity (D1)

931 **Appendix 2** – Photograph showing the baited free-fall lander trap designed and deployed by  
932 RBINS.

933 **Appendix 3** - Side-scan sonar image of site D5 showing possible seamount barriers. View  
934 from NW (top) to SE (bottom). Contours are every 25 m. (Source: GEOMAR, 2015).

935

936

937

938
